# Supplementary material for: Synthesis, photophysical and theoretical studies of luminescent silver(i)–copper(i) alkynyl-diphosphine complexes
Source: Royal Society of Chemistry journal article supplement (doi:10.1039/b920856a), 2010-01-01
Supplement: b920856a.pdf [file b920856a.pdf]

## Supporting Information

### Synthesis, Photophysical and Theoretical Studies of Luminescent Silver(I)–Copper(I) Alkynyl-Diphosphine Complexes

Igor O. Koshevoy,<sup>\*, †</sup> Antti J. Karttunen,<sup>†</sup> Yi-Chih Lin,<sup>‡</sup> Chao-Chen Lin,<sup>‡</sup> Pi-Tai Chou,<sup>\*, ‡</sup> Sergey P. Tunik,<sup>#</sup> Matti Haukka<sup>†</sup> and Tapani A. Pakkanen<sup>\*, †</sup>

Department of Chemistry, University of Joensuu, FI-80101, Joensuu, Finland;

Department of Chemistry, National Taiwan University, Taipei 106, Taiwan;

Department of Chemistry, St.-Petersburg State University, Universitetskii pr. 26, 198504, St.-Petersburg, Russia

E-mail: [igor.koshevoy@joensuu.fi](mailto:igor.koshevoy@joensuu.fi); [tapani.pakkanen@joensuu.fi](mailto:tapani.pakkanen@joensuu.fi); [chop@ntu.edu.tw](mailto:chop@ntu.edu.tw)

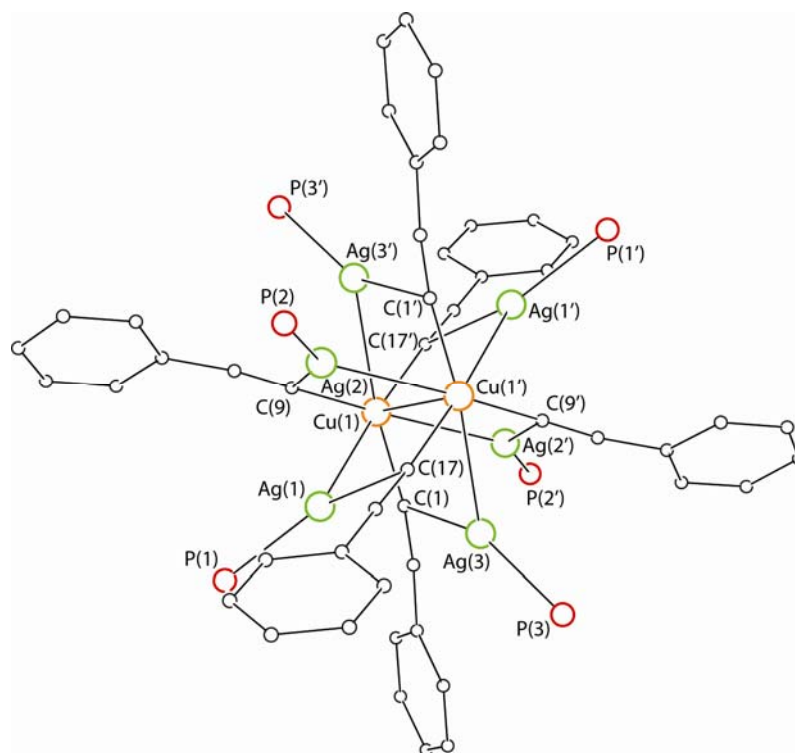

**Figure S1.** ORTEP view of the central heterometallic cluster of **1**. Selected interatomic distances (Å) are: Ag(1)–C(1) 2.520(5); Ag(1)–C(17) 2.425(5); Ag(1)–C(9) 2.514(5); Ag(2)–C(1') 2.527(5); Ag(2)–C(9) 2.436(5); Ag(2)–C(17) 2.602(5); Ag(3)–C(1) 2.431(5); Ag(3)–C(9') 2.529(5); Ag(3)–C(17) 2.503(5).

**X-ray Structure Determinations.** The weakly diffracting crystal of **3** was immersed in cryo-oil, mounted in a Nylon loop, and measured at a temperature of 100 K. The X-ray diffraction data was collected on a Nonius KappaCCD diffractometer using Mo K $\alpha$  radiation ( $\lambda = 0.71073 \text{ \AA}$ ). The *Denzo-Scalepack*<sup>1</sup> package was used for cell refinements and data reductions. The structure was solved by direct methods using the *SHELXS-97*<sup>2</sup> program with the *WinGX*<sup>3</sup> graphical user interface. A semi-empirical absorption correction (*SADABS*)<sup>4</sup> was applied to data. Structural refinement was carried out using *SHELXL-97*.<sup>2</sup> Two of the PF<sub>6</sub> anions in the asymmetric unit were disordered over two sites with occupancy ratios 0.51/0.49 and 0.50/0.50. Furthermore, the P-F and F...F distances in one of the PF<sub>6</sub> anions were set to be equal. All three NMe<sub>2</sub> -groups in the asymmetric unit were also disordered and all C---N distances were constrained to be similar, but otherwise no disorder model was used in the final refinement. One of the CH<sub>2</sub>Cl<sub>2</sub> solvent molecules was disordered over two sites with equal occupancies. Additional disorder was found in some phenyl rings. However, no disorder model was used for these groups in the final refinement. A series of displacement restraints were applied to the disordered moieties so that their U<sub>ij</sub> components approximate to isotropic behavior. One CH<sub>2</sub>Cl<sub>2</sub> and one CH<sub>3</sub>CN solvent molecules were heavily disordered and partially lost. The final structural model was refined without these solvent molecules. The contribution of the missing solvent molecules to the calculated structure factors was taken into account using SQUEEZE routine implemented in PLATON<sup>5</sup> program. The missing solvent molecules were taken into account in the cell content. Hydrogen atoms were positioned geometrically and constrained to ride on their parent atoms, with C-H = 0.95-0.99 Å and U<sub>iso</sub> = 1.2-1.5 U<sub>eq</sub>(parent atom).

1. Otwinowski, Z.; Minor, W. Processing of X-ray Diffraction Data Collected in Oscillation Mode, Academic Press, New York, pp. 307-326, 1997. In *Methods in Enzymology, Volume 276, Macromolecular Crystallography, Part A*, Carter, C. W., Sweet, J., Eds.; Academic Press: New York, USA, 1997; pp 307-326.
2. Sheldrick, G. M. *Acta Crystallogr. Sect. A* **2008**, A64, 112-122.
3. Farrugia, L. J. *J. Appl. Crystallogr.* **1999**, 32, 837.
4. Sheldrick, G. M. *SADABS-2008/1 - Bruker AXS area detector scaling and absorption correction*, Bruker AXS: Madison, Wisconsin, USA, 2008
5. Spek, A. L. *A Multipurpose Crystallographic Tool*, Utrecht University: Utrecht, The Netherlands, 2003

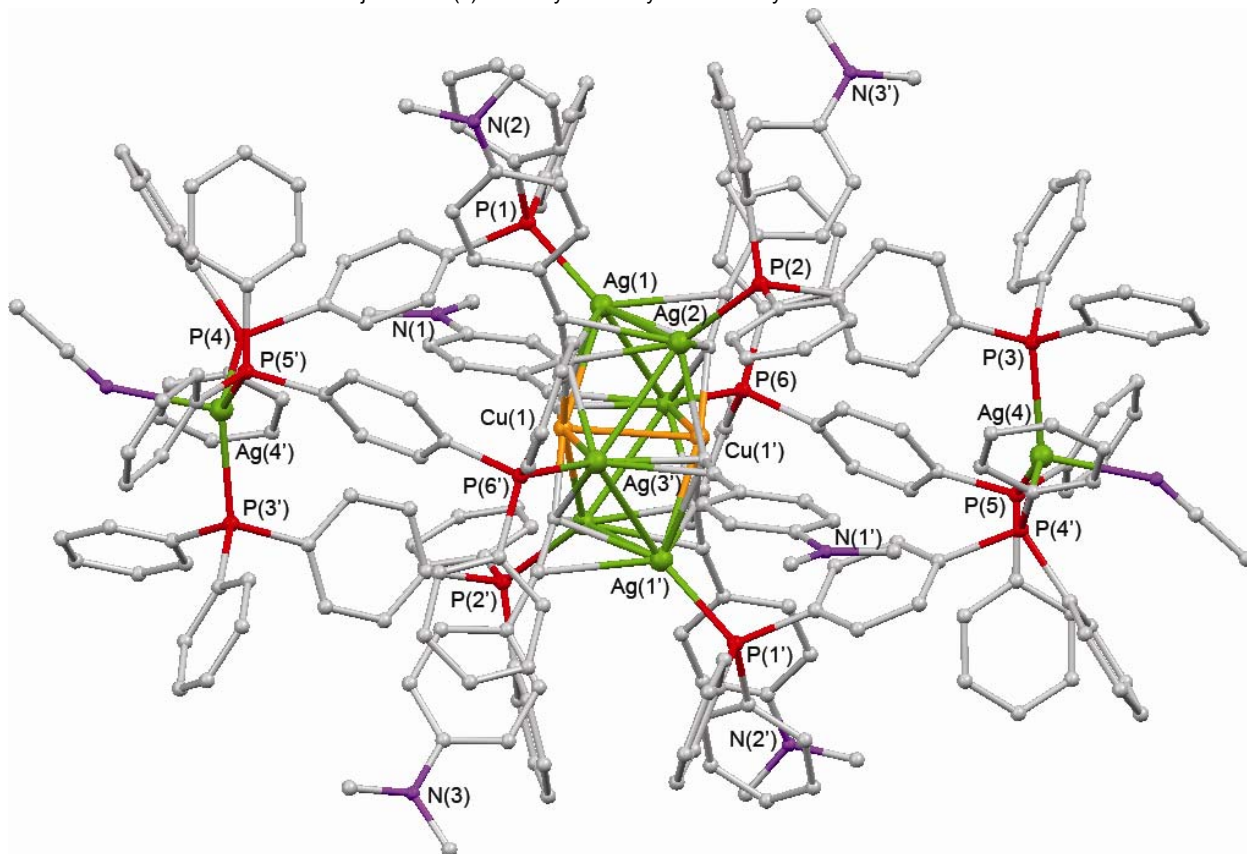

**Figure S2.** Molecular structure of the cluster **3**. Selected intermetallic distances (Å) are: Ag(1)-Cu(1) 2.7998(9); Ag(1)-Ag(3) 3.1011(7); Ag(1)-Ag(2) 3.1949(8); Ag(2)-Cu(1') 2.7888(8); Ag(2)-Ag(3') 3.1412(7); Ag(3)-Cu(1') 2.7847(9); Cu(1)-Cu(1') 2.8748(15). Symmetry transformations used to generate equivalent atoms: ' -x,-y,-z.

**Table S1.** Crystal data and structure refinement for **3**.

|                                 | <b>3</b>                                                                                                                          |                                |
|---------------------------------|-----------------------------------------------------------------------------------------------------------------------------------|--------------------------------|
| Identification code             | <b>3</b>                                                                                                                          |                                |
| Empirical formula               | C <sub>257</sub> H <sub>233</sub> Ag <sub>8</sub> Cl <sub>6</sub> Cu <sub>2</sub> F <sub>24</sub> N <sub>13</sub> P <sub>16</sub> |                                |
| Formula weight                  | 5657.82                                                                                                                           |                                |
| Temperature                     | 100(2) K                                                                                                                          |                                |
| Wavelength                      | 0.71073 Å                                                                                                                         |                                |
| Crystal system                  | Triclinic                                                                                                                         |                                |
| Space group                     | P $\bar{1}$                                                                                                                       |                                |
| Unit cell dimensions            | a = 17.4900(2) Å                                                                                                                  | $\alpha = 81.9800(10)^\circ$ . |
|                                 | b = 18.5715(3) Å                                                                                                                  | $\beta = 87.162(9)^\circ$ .    |
|                                 | c = 20.4761(4) Å                                                                                                                  | $\gamma = 78.3190(10)^\circ$ . |
| Volume                          | 6447.96(18) Å <sup>3</sup>                                                                                                        |                                |
| Z                               | 1                                                                                                                                 |                                |
| Density (calculated)            | 1.457 Mg/m <sup>3</sup>                                                                                                           |                                |
| Absorption coefficient          | 0.987 mm <sup>-1</sup>                                                                                                            |                                |
| F(000)                          | 2858                                                                                                                              |                                |
| Crystal size                    | 0.25 x 0.17 x 0.13 mm <sup>3</sup>                                                                                                |                                |
| Theta range for data collection | 2.43 to 25.15°.                                                                                                                   |                                |
| Index ranges                    | -20 ≤ h ≤ 20, -22 ≤ k ≤ 22, -24 ≤ l ≤ 24                                                                                          |                                |
| Reflections collected           | 116760                                                                                                                            |                                |
| Independent reflections         | 23031 [R(int) = 0.0467]                                                                                                           |                                |
| Completeness to theta = 25.15°  | 99.7 %                                                                                                                            |                                |
| Absorption correction           | Semi-empirical from equivalents                                                                                                   |                                |
| Max. and min. transmission      | 0.8857 and 0.7932                                                                                                                 |                                |

|                                   |                                             |
|-----------------------------------|---------------------------------------------|
| Refinement method                 | Full-matrix least-squares on F <sup>2</sup> |
| Data / restraints / parameters    | 23031 / 265 / 1461                          |
| Goodness-of-fit on F <sup>2</sup> | 1.062                                       |
| Final R indices [I > 2σ(I)]       | R1 = 0.0687, wR2 = 0.1765                   |
| R indices (all data)              | R1 = 0.0817, wR2 = 0.1839                   |
| Largest diff. peak and hole       | 2.883 and -1.873 e.Å <sup>-3</sup>          |

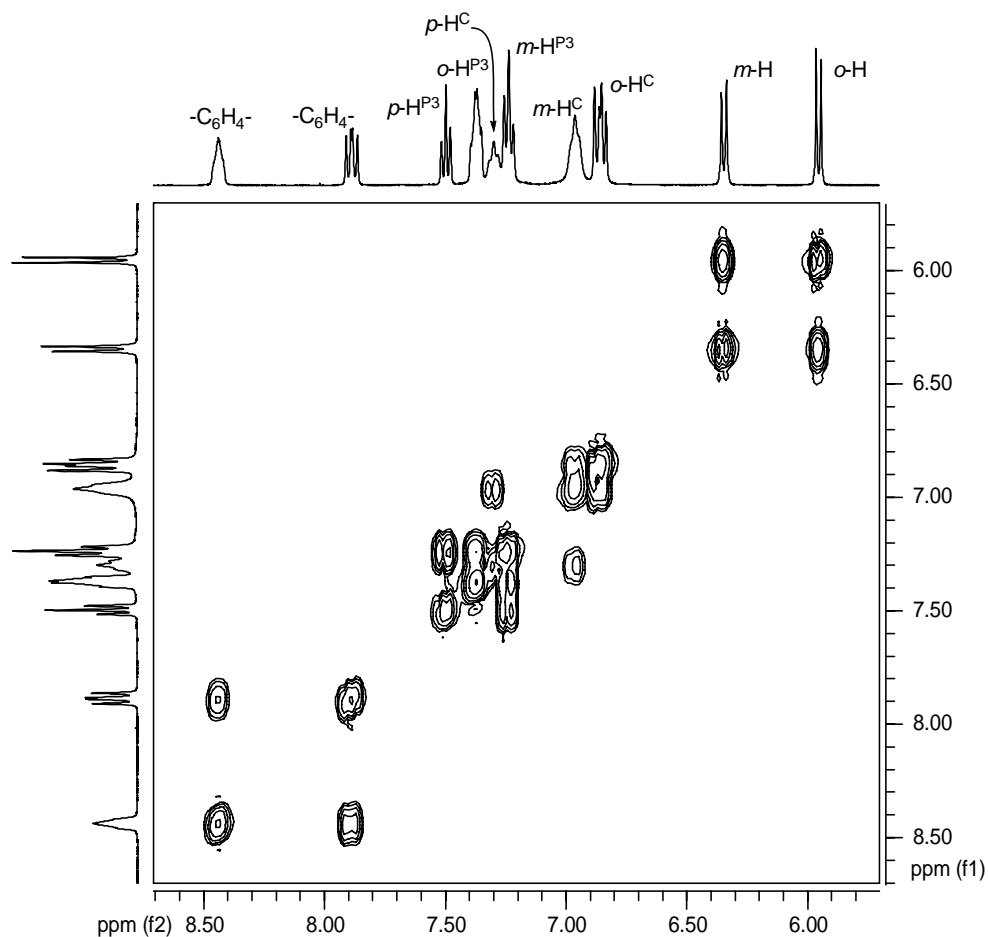

**Figure S3.** The <sup>1</sup>H COSY spectrum of **2** (aromatic region), 400 MHz, acetone-d<sub>6</sub>, 298 K. H – phenyl protons of the C<sub>2</sub>Ph ligands; H<sup>P3</sup> – phenyl protons of the dppb (PPh<sub>2</sub>C<sub>6</sub>H<sub>4</sub>PPh<sub>2</sub>) ligands, adjacent to the {AgP<sub>3</sub>} fragment; H<sup>C</sup> – phenyl protons of the dppb ligands, adjacent to the {Ag<sub>6</sub>Cu<sub>2</sub>} fragment.

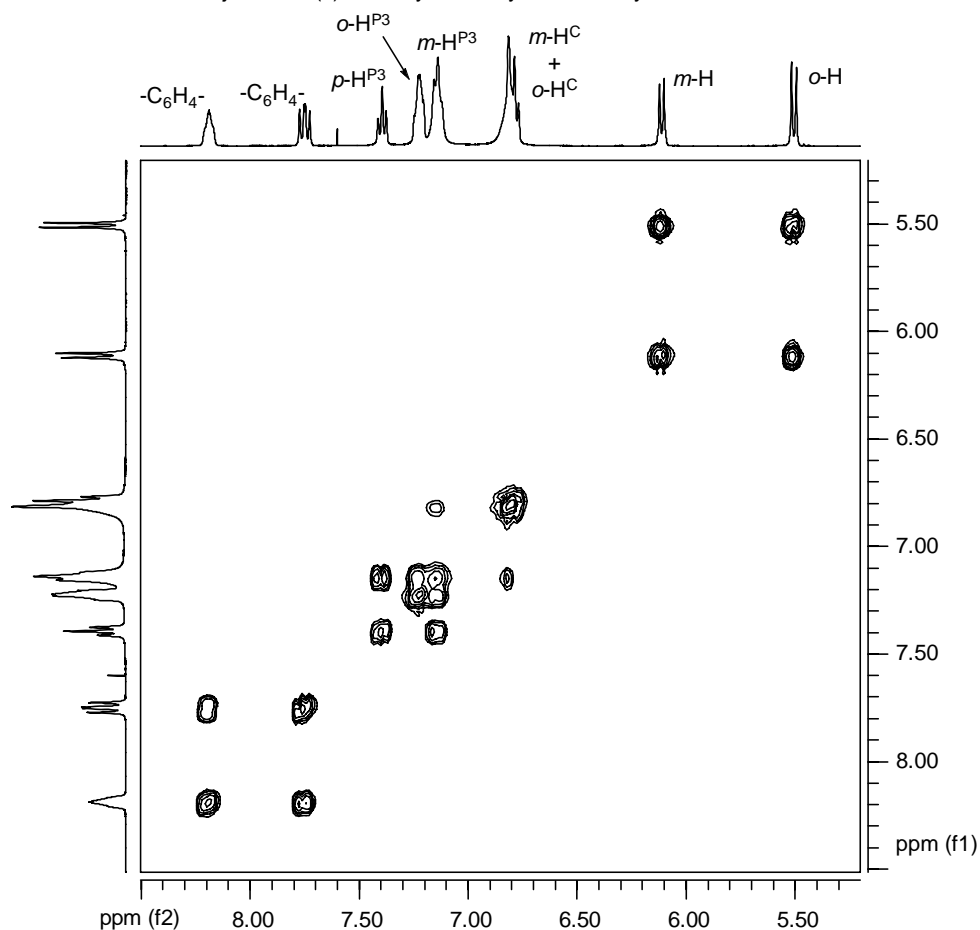

**Figure S4.** The <sup>1</sup>H COSY spectrum of **3** (aromatic region), 400 MHz, acetone-d<sub>6</sub>, 298 K. H – phenyl protons of the C<sub>2</sub>Ph ligands; H<sup>P3</sup> – phenyl protons of the dppb ligands, adjacent to the {AgP<sub>3</sub>} fragment; H<sup>C</sup> – phenyl protons of the dppb ligands, adjacent to the {Ag<sub>6</sub>Cu<sub>2</sub>} fragment.

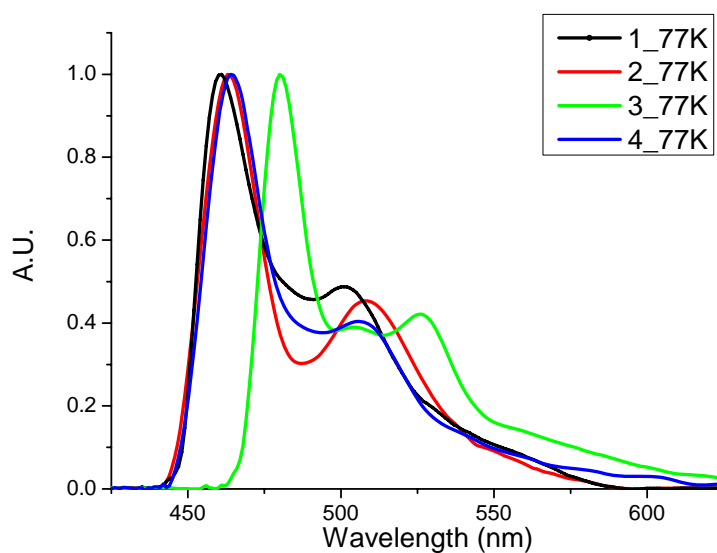

**Figure S5.** The emission spectra of complexes **1-4** in acetonitrile at 77 K.

## Computational Data

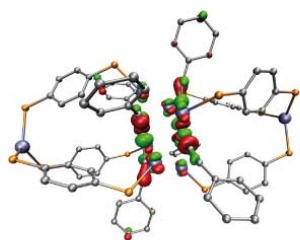

(1) HOMO - 3

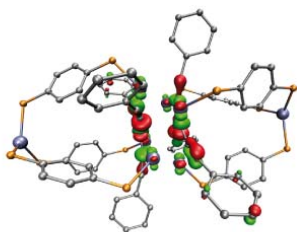

(1) HOMO - 2

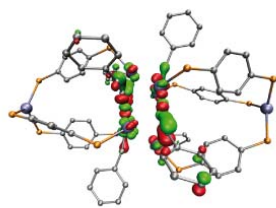

(1) HOMO - 1

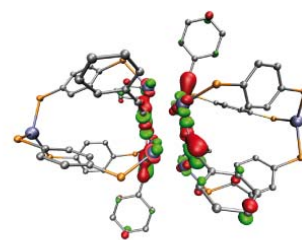

(1) HOMO

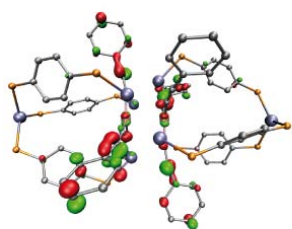

(1) LUMO

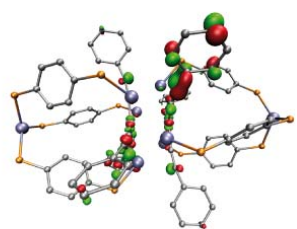

(1) LUMO + 1

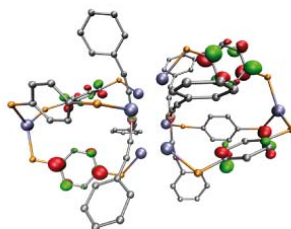

(1) LUMO + 2

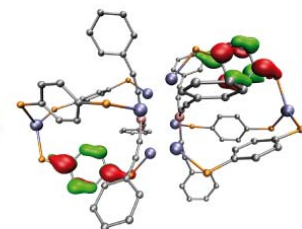

(1) LUMO + 3

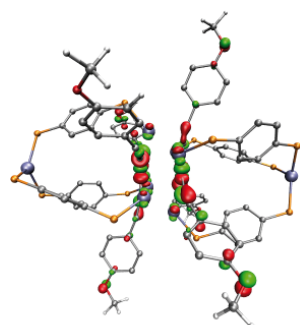

(2) HOMO - 3

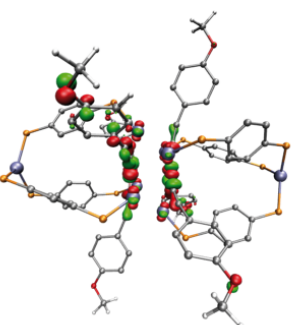

(2) HOMO - 2

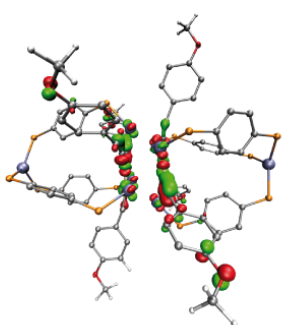

(2) HOMO - 1

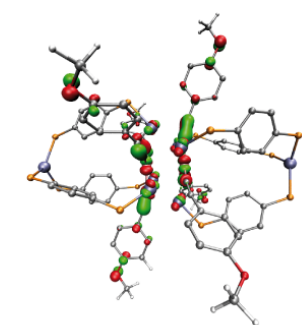

(2) HOMO

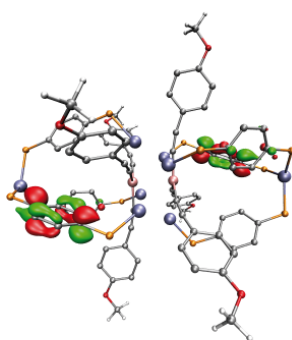

(2) LUMO

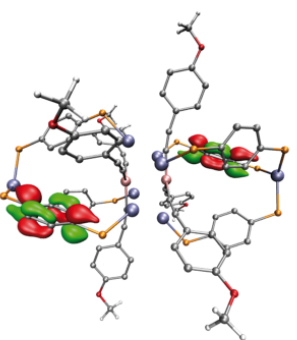

(2) LUMO + 1

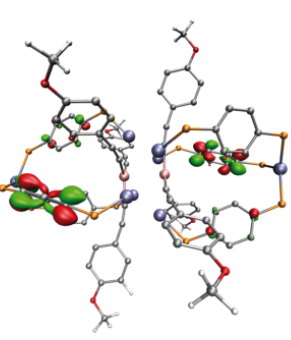

(2) LUMO + 2

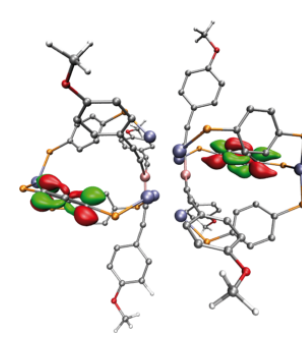

(2) LUMO + 3

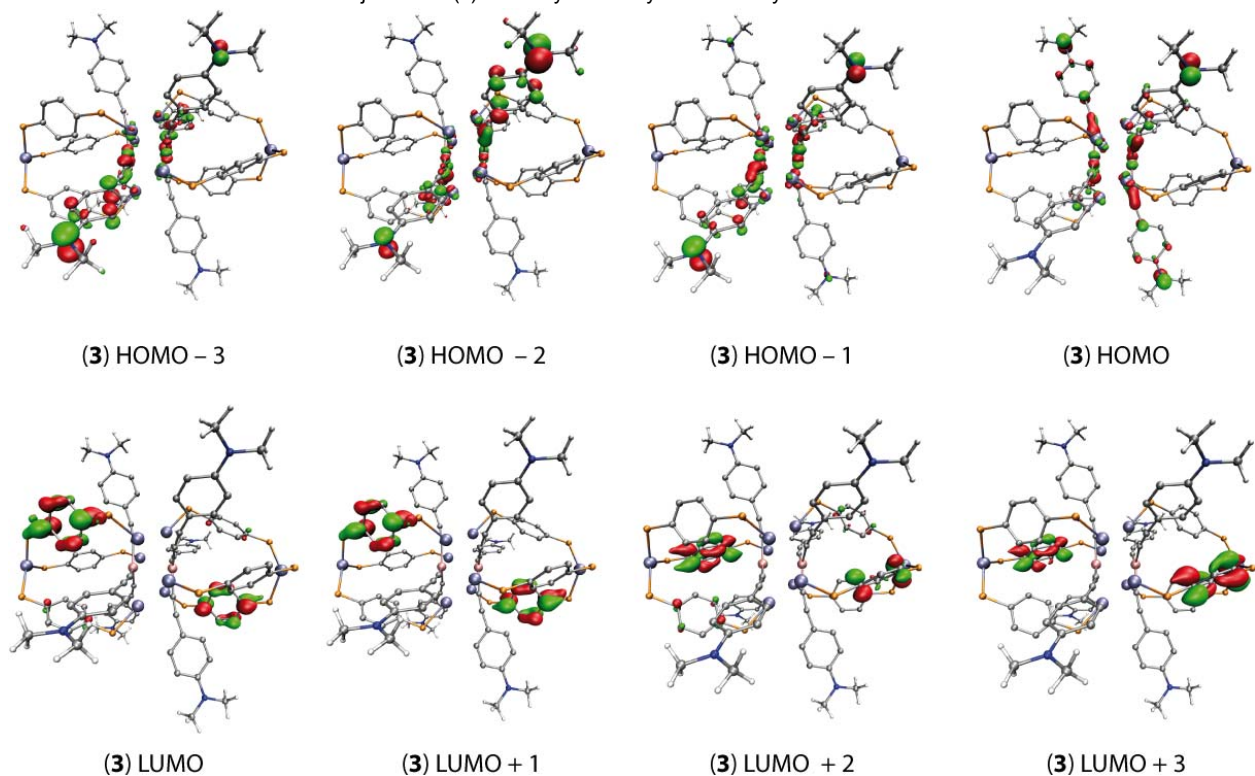

**Figure S6.** Frontier molecular orbital isodensity plots for the complexes **1–3** (isodensity value 0.04 a.u.). Phenyl rings of the diphosphine ligands, acetonitrile ligands, hydrogen atoms, and most bonds within the central metal cluster have been omitted for clarity.

Optimized Cartesian coordinates of the studied systems in atomic units (BP86 level of theory)

$[\text{Ag}_8\text{Cu}_2(\text{C}_2\text{Ph})_6(\text{PPh}_2\text{C}_6\text{H}_4\text{PPh}_2)_6]^{4+}$  (**1**)

|                    |                   |                    |    |
|--------------------|-------------------|--------------------|----|
| -0.69288784801556  | -5.40143823870970 | 0.97603682569636   | ag |
| 4.93738282506923   | -2.34744212378054 | 0.66981238479290   | ag |
| -2.48421474470207  | -2.30830408767319 | -4.44497682702848  | ag |
| 9.16569670834339   | 1.88945071791758  | -14.38454007841186 | ag |
| -1.37859158183061  | -0.30067751856449 | 2.21894274340879   | cu |
| -2.29386833968588  | -9.19601471121246 | 3.24797451913195   | p  |
| 9.23909727516060   | -3.78679269113506 | -0.53326780842962  | p  |
| -3.44678421840371  | -3.67191766834982 | -8.82298893798890  | p  |
| 12.79791872161610  | 0.90599082054992  | -11.40848910708077 | p  |
| 6.47975646440920   | -1.81597376410665 | -15.99685760731754 | p  |
| -6.73169925386567  | -6.05796924024476 | 14.38502220353627  | p  |
| 0.71951194003521   | 5.39181349137796  | -0.95304257496393  | ag |
| -4.90608802063860  | 2.33954212306726  | -0.64662798397163  | ag |
| 2.52683164360592   | 2.29528894800637  | 4.45448627164369   | ag |
| -9.13544865906878  | -1.88231344269369 | 14.40378278610674  | ag |
| 1.40971094900072   | 0.28867018819555  | -2.19768083270408  | cu |
| 2.31517604268417   | 9.18848069346478  | -3.22605421090759  | p  |
| -9.20655397994832  | 3.78081125886546  | 0.55913166463072   | p  |
| 3.49318147974723   | 3.65000359813674  | 8.83453624010618   | p  |
| -12.77466468038328 | -0.90603982289057 | 11.43376486765873  | p  |
| -6.43583533738343  | 1.81506714050831  | 16.01045018162784  | p  |
| 6.74564643431488   | 6.05666963523597  | -14.36777979517107 | p  |
| -4.05816576637000  | -2.18531621288697 | 0.33564762197490   | c  |
| -5.94133824627072  | -3.39638672545505 | -0.50279681939409  | c  |
| -8.24774124120578  | -4.69602331834865 | -1.06604194637625  | c  |
| -8.80633044056549  | -5.63666487370298 | -3.51748150185827  | c  |
| -11.12059128091325 | -6.82408290934337 | -4.01670667618705  | c  |
| -12.92292492882210 | -7.11922346865732 | -2.08561097142866  | c  |
| -12.38897105732890 | -6.21620235016146 | 0.35784775112583   | c  |
| -10.08523437163111 | -5.01807024167741 | 0.87261591158520   | c  |
| 1.45056307856131   | -2.19673224794469 | 3.87715279658515   | c  |
| 3.00774826169557   | -3.48427918688824 | 5.16604734161318   | c  |

Supplementary Material (ESI) for Dalton Transactions  
This journal is (c) The Royal Society of Chemistry 2010

|                    |                    |                    |   |
|--------------------|--------------------|--------------------|---|
| 4.36921508208341   | -5.00799618966667  | 6.94559623128518   | c |
| 3.06837373860493   | -6.02361788230635  | 9.07013350651307   | c |
| 4.32793774398560   | -7.57955324955535  | 10.80268768235140  | c |
| 6.90305238968032   | -8.15579753092538  | 10.47437620863724  | c |
| 8.21535913915733   | -7.15241081733362  | 8.39266757891199   | c |
| 6.97057434623288   | -5.59645235694474  | 6.64731363048635   | c |
| 1.67436008751746   | -3.47538367236872  | -2.62902320502064  | c |
| 2.04037532228676   | -5.77047529726797  | -3.21871847211920  | c |
| 2.66122144321882   | -8.16415516107399  | -4.32707498607656  | c |
| 2.09967577447387   | -10.49832375578232 | -3.12705252623764  | c |
| 2.68877177517200   | -12.79869639369587 | -4.30113401800371  | c |
| 3.85933035224698   | -12.82915267483889 | -6.68707112608675  | c |
| 4.44069125208425   | -10.53225345491735 | -7.89409206674101  | c |
| 3.84681425016196   | -8.22438404465352  | -6.74160974522436  | c |
| 9.55178684001002   | -7.16938689634118  | -1.32217006096031  | c |
| 11.34333200322805  | -8.03091341390506  | -3.10642764875443  | c |
| 11.67359395679645  | -10.63165506497731 | -3.51833719519658  | c |
| 10.22847587149609  | -12.39386896472241 | -2.15251945262540  | c |
| 8.43078938157089   | -11.54746420746579 | -0.39151878101267  | c |
| 8.08375642183914   | -8.94729697666068  | 0.01624621909902   | c |
| 11.86937225616592  | -3.23032083373675  | 1.70755906289229   | c |
| 12.04571761412181  | -0.84881363249943  | 2.90406071076614   | c |
| 14.05255530434058  | -0.32356912983172  | 4.56096213494662   | c |
| 15.87889365545851  | -2.18386658319254  | 5.08173161133923   | c |
| 15.69015478444951  | -4.57061431398178  | 3.93287022395449   | c |
| 13.70521291695310  | -5.09364523742430  | 2.24486119155145   | c |
| -5.82516546399573  | -1.78122733253087  | -10.53505031679782 | c |
| -5.71141340812969  | -1.46402210124087  | -13.18530998003525 | c |
| -7.64484453512982  | -0.16708933870074  | -14.45948540995591 | c |
| -9.70964645586167  | 0.81663799259890   | -13.10682993663152 | c |
| -9.82540837178203  | 0.51899053481130   | -10.47106996921992 | c |
| -7.88698729694450  | -0.76220218384784  | -9.18686599186696  | c |
| -4.46373348311403  | -6.97482484020981  | -9.35785065639918  | c |
| -6.41524377126947  | -7.61129422162768  | -11.06562428799203 | c |
| -7.07530949118904  | -10.15581290342537 | -11.45496783970271 | c |
| -5.78392138685651  | -12.08706505710309 | -10.16833205699788 | c |
| -3.84869789142102  | -11.46448889518103 | -8.45519030484942  | c |
| -3.208484455701364 | -8.92311939117622  | -8.03039663333023  | c |
| -0.59170198540165  | -3.31644032517741  | -10.82822641988915 | c |
| 0.63759705974251   | -0.94633336590433  | -10.83825286945045 | c |
| 2.74345410408860   | -0.53216305147354  | -12.39400814343911 | c |
| 3.70493249455791   | -2.47623076907330  | -13.95020123440844 | c |
| 2.50740349150505   | -4.85973761566139  | -13.89272553695427 | c |
| 0.37407936833588   | -5.27260410275589  | -12.36092341260280 | c |
| 5.12230333813707   | -1.28241349595507  | -19.16932330632130 | c |
| 6.79922626874093   | -0.51704005541868  | -21.10480206574776 | c |
| 5.92812613000874   | -0.22345108290022  | -23.59334599744530 | c |
| 3.36800060322661   | -0.64728492837393  | -24.17076415404450 | c |
| 1.68509904179641   | -1.36352963960698  | -22.24658194992753 | c |
| 2.55369494614922   | -1.68729717980449  | -19.75597136964976 | c |
| 7.97245290751117   | -4.97059958676852  | -16.29370333968559 | c |
| 7.65347799894915   | -6.51426359306674  | -18.44780161465157 | c |
| 8.81290276194329   | -8.90274329266592  | -18.56675605485897 | c |
| 10.28769730779354  | -9.77808972599683  | -16.54013850290865 | c |
| 10.61404264856039  | -8.24962011291947  | -14.38991812023284 | c |
| 9.47495552154801   | -5.85636131092093  | -14.27141834276755 | c |
| 14.87638655141315  | -1.64755739230796  | -12.58929224025012 | c |
| 16.43058566015420  | -3.11056437430847  | -10.98422080710963 | c |
| 18.05006212456566  | -4.950386021111057 | -12.00333802069766 | c |
| 18.13703010716606  | -5.35104460279258  | -14.62969058172977 | c |
| 16.58844745493418  | -3.91233828946942  | -16.23574618514796 | c |
| 14.95859375534469  | -2.07636596751579  | -15.22268573935792 | c |
| 15.00768879233732  | 3.51943097603348   | -10.68301109898708 | c |
| 17.54720554235315  | 3.50681549761324   | -11.49886308942100 | c |
| 19.13156277167360  | 5.57819008908733   | -10.97957661040474 | c |
| 18.20487894433072  | 7.67152147832491   | -9.63609359218209  | c |
| 15.67102274428369  | 7.70099921671808   | -8.82693692495929  | c |
| 14.07651899693479  | 5.64766563826544   | -9.35822640899096  | c |
| 11.80843453863067  | -0.18090117212441  | -8.22414179988781  | c |
| 9.39074395665903   | -1.27505864976473  | -7.92128972182387  | c |
| 8.62996452923183   | -2.26306052265550  | -5.58084237629947  | c |
| 10.28682360917904  | -2.21786458379328  | -3.48798754372299  | c |
| 12.67059364118369  | -1.05697584591241  | -3.75985057178756  | c |
| 13.41266604146467  | -0.03102801614472  | -6.09638186206781  | c |
| -5.07900121986213  | -10.73189622227823 | 1.81401252719979   | c |
| -5.22628967576553  | -10.87943875460964 | -0.84466558492764  | c |
| -7.18968809012690  | -12.23734630996485 | -2.00430261693634  | c |
| -9.03689659327815  | -13.43918844305092 | -0.52274451948479  | c |
| -8.92368495309135  | -13.26759607919226 | -2.12560575751752  | c |
| -6.95599058471766  | -11.92222216377021 | 3.29394471142005   | c |



Supplementary Material (ESI) for Dalton Transactions  
This journal is (c) The Royal Society of Chemistry 2010

|                    |                    |                    |   |
|--------------------|--------------------|--------------------|---|
| -0.10799912266957  | -11.87629903568537 | 3.79352602767637   | c |
| 2.36183413014682   | -11.34946158138854 | 4.66311875631746   | c |
| 4.05529494881222   | -13.32836269205302 | 5.17605894093199   | c |
| 3.32271429451221   | -15.85289975981859 | 4.77771356989184   | c |
| 0.88456172369099   | -16.38832204181931 | 3.87240165634999   | c |
| -0.82925104171559  | -14.41527852235624 | 3.38769710648858   | c |
| -3.41538957081250  | -8.35552983966927  | 6.46425844145895   | c |
| -4.65987973750284  | -6.02249647109296  | 6.80920717376469   | c |
| -5.64874646264585  | -5.36474260667088  | 9.18597454660260   | c |
| -5.38596641965862  | -6.99844433753155  | 11.27768992925087  | c |
| -4.13030965250915  | -9.32891239348643  | 10.92743170808206  | c |
| -3.15143985003066  | -9.99832410804399  | 8.55292898736287   | c |
| -3.98018313387675  | -6.00837693966599  | 16.53471422987469  | c |
| -1.46141222947504  | -5.90793792115340  | 15.66562513485743  | c |
| 0.55234802469442   | -5.75415406763613  | 17.39408520129208  | c |
| 0.07611726477939   | -5.71169666360662  | 20.00361150076937  | c |
| -2.43061032735421  | -5.78763267887561  | 20.88398695217498  | c |
| -4.44586608213329  | -5.91110665818631  | 19.16613108297231  | c |
| -8.51522777391960  | -8.89916828936831  | 15.37555385440919  | c |
| -11.08961534973946 | -9.05917932898953  | 14.68836003824670  | c |
| -12.51324379875118 | -11.21289658631248 | 15.31115571790169  | c |
| -11.38939034371412 | -13.21398476731294 | 16.65109202188125  | c |
| -8.83307083708478  | -13.05778561844202 | 17.35856904850861  | c |
| -7.39694585201174  | -10.91523595879677 | 16.72466109225847  | c |
| 4.08988116563015   | 2.17519692762622   | -0.31715336101134  | c |
| 5.97478726076780   | 3.38914152400544   | 0.51371292317044   | c |
| 8.284314888403251  | 4.68841449390463   | 1.064968899046274  | c |
| 8.85738834117085   | 5.62624481726100   | 3.51414207365496   | c |
| 11.17515419334000  | 6.81196015020736   | 4.00120200256526   | c |
| 12.96869486202735  | 7.10337829572262   | 2.06133263780612   | c |
| 12.41992181168353  | 6.20389698525793   | -0.38014504178326  | c |
| 10.11166685446100  | 5.00959258191540   | -0.88338377524133  | c |
| -1.42050830541534  | 2.18316706143440   | -3.85551785995616  | c |
| -2.98126371121734  | 3.46923201192241   | -5.14179435326942  | c |
| -4.34658884415369  | 4.99115886781315   | -6.92011392069540  | c |
| -3.05121819520934  | 6.00194544851704   | -9.05025713128775  | c |
| -4.31602469712808  | 7.55124412165222   | -10.78494844037770 | c |
| -6.89202561339959  | 8.12276624561668   | -10.45515417318846 | c |
| -8.19754378778120  | 7.12891175827569   | -8.36463817662304  | c |
| -6.94730151023628  | 5.57981943523926   | -6.61707254842895  | c |
| -1.64044936642686  | 3.46296030618454   | 2.65161682497688   | c |
| -2.00295910180429  | 5.75868331175518   | 3.24124770367457   | c |
| -2.61937422089680  | 8.15411373414065   | 4.34825649749393   | c |
| -2.05945462953328  | 10.48625438476772  | 3.14359103067084   | c |
| -2.63947738853027  | 12.78861708373119  | 4.31824528933359   | c |
| -3.80011748305688  | 12.82305837062231  | 6.70894544052572   | c |
| -4.37979463267371  | 10.52818289001376  | 7.92063233364787   | c |
| -3.79774801573786  | 8.21825702509089   | 6.76620573221249   | c |
| -9.51688945808775  | 7.16350730837326   | 1.34907781624839   | c |
| -11.30141419237738 | 8.02599755996886   | 3.13988023991648   | c |
| -11.62138564751449 | 10.62674157892793  | 3.56022940447579   | c |
| -10.17185391495839 | 12.38788324113711  | 2.19776647296634   | c |
| -8.38447079892883  | 11.54050982047197  | 0.42676278168675   | c |
| -8.04924051162988  | 8.94046710916991   | 0.00894566792034   | c |
| -11.83593126011843 | 3.22553965406537   | -1.68289949733798  | c |
| -12.00843888044796 | 0.84650852834973   | -2.88489442960131  | c |
| -14.02300164790423 | 0.31633225863274   | -4.53081730032157  | c |
| -15.85711798788517 | 2.17197719745420   | -5.04072096528273  | c |
| -15.67272653052379 | 4.55632260428264   | -3.88606656670148  | c |
| -13.67828141784510 | 5.08504505489143   | -2.21108947704153  | c |
| 5.87080928335740   | 1.75483552226262   | 10.54261270787893  | c |
| 5.75209006905374   | 1.42303101737415   | 13.19079439661187  | c |
| 7.68421494106783   | 0.12086345700935   | 14.46172527450384  | c |
| 9.74930945075557   | -0.85922481734289  | 13.10703090253974  | c |
| 9.86946511798609   | -0.54792603699515  | 10.47302175663669  | c |
| 7.93595794826241   | 0.74454142866086   | 9.19286518250491   | c |
| 4.51570754678015   | 6.95087710022477   | 9.37325070160365   | c |
| 6.46622066746372   | 7.58257381144123   | 11.08388415403767  | c |
| 7.12126379899726   | 10.12642835511042  | 11.48598927105390  | c |
| 5.83052419253866   | 12.06123535845652  | 10.20404725392147  | c |
| 3.89955010683087   | 11.44315076725283  | 8.48448625254163   | c |
| 3.26163388380870   | 8.90282222399363   | 8.05022239871035   | c |
| 0.64028575115582   | 3.29576206395510   | 10.84266358793309  | c |
| -0.59615188243389  | 0.92934343702892   | 10.85000388115785  | c |
| -2.70061262115285  | 0.51827275250121   | 12.40876449186303  | c |
| -3.65606460963108  | 2.46365214975116   | 13.96685622341099  | c |
| -2.44995142248116  | 4.84292261425764   | 13.91383675984915  | c |
| -0.31822824950420  | 5.25238333670428   | 12.37935516151725  | c |
| -5.08488216642165  | 1.27909648592224   | 19.18537644882884  | c |
| -6.76940171579776  | 0.53774625007759   | 21.12366273532249  | c |

Supplementary Material (ESI) for Dalton Transactions  
This journal is (c) The Royal Society of Chemistry 2010

|                    |                    |                    |   |
|--------------------|--------------------|--------------------|---|
| -5.90126823011303  | 0.24432227377208   | 23.61326155310073  | c |
| -3.33685128708217  | 0.64356576783351   | 24.18912589046208  | c |
| -1.64653464488143  | 1.33395400097188   | 22.26203893576356  | c |
| -2.51227757903499  | 1.65990974812171   | 19.77071625631657  | c |
| -7.91156480860377  | 4.97860109073355   | 16.30051555721620  | c |
| -7.59216749278542  | 6.52174565754203   | 18.45487197785493  | c |
| -8.72569959003933  | 8.92323531175453   | 18.56147361433003  | c |
| -10.17663954874308 | 9.81115538490049   | 16.52311887664182  | c |
| -10.50622451008670 | 8.28180196376245   | 14.37400230478651  | c |
| -9.39391984799985  | 5.87534208143272   | 14.26811528776120  | c |
| -14.84469405801744 | 1.65545743550355   | 12.61339036460404  | c |
| -16.45010141291931 | 3.06967835695368   | 11.01449199268435  | c |
| -18.04559880216698 | 4.93244277109699   | 12.02887401808592  | c |
| -18.06294346936112 | 5.40023360034524   | 14.64576122328190  | c |
| -16.46976440659393 | 4.00495559026214   | 16.24614716752071  | c |
| -14.86147983341800 | 2.14781845045754   | 15.23651615152727  | c |
| -14.99160788223170 | -3.51469216223940  | 10.71676742143885  | c |
| -17.51246335717371 | -3.51700322642607  | 11.58922967810498  | c |
| -19.10295559151093 | -5.58740277226025  | 11.08592513989336  | c |
| -18.19892449992259 | -7.66920907759201  | 9.70945002537643   | c |
| -15.68479189524881 | -7.68254605775249  | 8.84068936353481   | c |
| -14.08508929596715 | -5.62797609415954  | 9.35140227141120   | c |
| -11.78510264722154 | 0.17625910958912   | 8.24732720761613   | c |
| -9.36546335394684  | 1.26654152363937   | 7.94552856123168   | c |
| -8.60109092597989  | 2.25263035290525   | 5.60549559535584   | c |
| -10.25722884386126 | 2.21114573412882   | 3.51205092179291   | c |
| -12.64319260188366 | 1.05450939497748   | 3.78263485966039   | c |
| -13.38864312498009 | 0.03016228716086   | 6.11880315992376   | c |
| 5.10040813878201   | 10.72863826985316  | -1.79666491053390  | c |
| 5.25305413946907   | 10.87519110994943  | 0.86173115236712   | c |
| 7.21674886925258   | 12.23570839335134  | 2.01787162121229   | c |
| 9.05876231984869   | 13.44143685084247  | 0.53304756297365   | c |
| 8.94103555340448   | 13.26973146954854  | -2.11510521323063  | c |
| 6.97244739202932   | 11.92267709271204  | -3.27993901501100  | c |
| 0.12554314240567   | 11.86555996343098  | -3.77252370951196  | c |
| -2.34505174677164  | 11.33392300086279  | -4.63680759981882  | c |
| -4.03933221100718  | 13.30986928040676  | -5.15838533711486  | c |
| -3.30665276608706  | 15.83650044980775  | -4.77400028847061  | c |
| -0.86882464706620  | 16.37676395689583  | -3.87059514091699  | c |
| 0.84623678551533   | 14.40659735844453  | -3.37860472202458  | c |
| 3.43407905198444   | 8.34858603945075   | -6.44349572561065  | c |
| 4.68201930889800   | 6.01753915594851   | -6.78948846574430  | c |
| 5.66890727579425   | 5.36081124363883   | -9.16740875037063  | c |
| 5.40354710890743   | 6.99516218082752   | -11.25835307810415 | c |
| 4.14286270039368   | 9.32275782692474   | -10.90739157315143 | c |
| 3.16551072772380   | 9.99081832539723   | -8.53196160406634  | c |
| 3.98785797373488   | 5.99226810473870   | -16.50949781919803 | c |
| 1.47136861053330   | 5.89538712298630   | -15.63358399270517 | c |
| -0.54790413546486  | 5.75552692050868   | -17.35681706895448 | c |
| -0.07924471742247  | 5.72265401897094   | -19.96782740831931 | c |
| 2.42551027647719   | 5.78514681288947   | -20.85484186743440 | c |
| 4.44605305410425   | 5.89420329048420   | -19.14221506090480 | c |
| 8.50924212980927   | 8.90686652958849   | -15.36891533870099 | c |
| 11.08542560732893  | 9.08411034754606   | -14.69237038709216 | c |
| 12.49462562490810  | 11.24286394536153  | -15.32990068632971 | c |
| 11.35411602196378  | 13.23292741061554  | -16.67210868931305 | c |
| 8.79553748899712   | 13.06024431211404  | -17.36800442476895 | c |
| 7.37415835011793   | 10.91187028460386  | -16.72066199298790 | c |
| -3.62076720467237  | -1.35061020681824  | -12.41215392024666 | h |
| 2.68635668303433   | -0.42087237297689  | -26.12622433913831 | h |
| -0.32315052032521  | -1.69744298023977  | -22.68895250755370 | h |
| 7.25755109892040   | 0.33601973858679   | -25.09691619197920 | h |
| 8.80594496353967   | -0.16609556326480  | -20.66434222214661 | h |
| 1.21683307060491   | -2.27085810180352  | -18.27057571624247 | h |
| -7.42677408467114  | -6.12202498427486  | -12.10973328322308 | h |
| -8.60395093163280  | -10.62834057413403 | -12.78913908881010 | h |
| -6.28363362727966  | -14.08131088183340 | -10.50545282491346 | h |
| -2.82135593707578  | -12.96403471308044 | -7.43863127032323  | h |
| -1.69323349063501  | -8.46037004924298  | -6.67607249487223  | h |
| 9.77661076788205   | -4.66311906623319  | -12.58977096334163 | h |
| 11.79561606391085  | -8.90815883349298  | -12.80603331928368 | h |
| 11.19792927087274  | -11.64908277059897 | -16.64332748172115 | h |
| 8.55967946392503   | -10.08441552000051 | -20.26367995741702 | h |
| 6.49918322242951   | -5.85557133418496  | -20.04973253903776 | h |
| 1.07231012611399   | 5.94615578285125   | -13.59088993980360 | h |
| -2.50413989736634  | 5.68391621106353   | -16.64342436516749 | h |
| -1.66343195443603  | 5.6466007788968    | -21.31790882261458 | h |
| 2.81153458154155   | 5.74119649781253   | -22.90031270180001 | h |
| 6.39953143496171   | 5.93068837244511   | -19.86571036193949 | h |
| 5.37645987521555   | 10.79562800320333  | -17.29791322666047 | h |

Supplementary Material (ESI) for Dalton Transactions  
This journal is (c) The Royal Society of Chemistry 2010

|                    |                    |                     |   |
|--------------------|--------------------|---------------------|---|
| 7.89340536186494   | 14.61168796388440  | -18.42606800228792  | h |
| 12.46246157536343  | 14.92073218010861  | -17.18512806141359  | h |
| 14.50034089307722  | 11.36375017426334  | -14.77936413280350  | h |
| 12.00116175244395  | 7.52511933474352   | -13.65434852042180  | h |
| 18.30658416475802  | 1.86728326696711   | -12.53292671565273  | h |
| 21.11255794284202  | 5.54326455666922   | -11.62355813870677  | h |
| 19.45795666906758  | 9.28130639957611   | -9.21455006909225   | h |
| 14.92615037961397  | 9.34428129698302   | -7.78455153846872   | h |
| 12.08847960961113  | 5.70084597065297   | -8.72780775028535   | h |
| 16.38882221198693  | -2.82301063916938  | -8.92251587695153   | h |
| 19.26557759908654  | -6.07155621373121  | -10.73587434306304  | h |
| 19.41292438439072  | -6.79378441990953  | -15.42351984955489  | h |
| 16.63636853463638  | -4.22992753717833  | -18.29357857025168  | h |
| 13.73573167087126  | -0.96408482393620  | -16.49079480979114  | h |
| 4.26920663759130   | -6.43449915183761  | -7.71375816267942   | h |
| 5.36424064630888   | -10.53739415885679 | -9.76126833378640   | h |
| 4.32069916204444   | -14.64073843230852 | -7.60560485460606   | h |
| 2.23927519629963   | -14.58663789667199 | -3.33199912393422   | h |
| 1.20932119239484   | -10.48146097172202 | -1.24599067336315   | h |
| 12.50134891389272  | -6.66669418770064  | -4.17210166220030   | h |
| 13.07831811585625  | -11.28709756651947 | -4.91030902787823   | h |
| 10.50141924260620  | -14.43458547990538 | -2.46876097908928   | h |
| 7.27348496784094   | -12.91571563797548 | 0.66904420392284    | h |
| 6.65621612150053   | -8.29642470146237  | 1.39000965015430    | h |
| 13.60169243501726  | -6.96416914308535  | 1.33878754400074    | h |
| 17.10863955828433  | -6.04172093862304  | 4.33800722221133    | h |
| 17.45364653701565  | -1.77224773469533  | 6.38217043674058    | h |
| 14.18395831876270  | 1.55711341940482   | 5.44584857235194    | h |
| 10.62582677128620  | 0.62690014384183   | 2.51714104686039    | h |
| 13.97963340272601  | -0.95984006701953  | -2.14404677439328   | h |
| 15.27859572998321  | 0.88165579586295   | -6.25441003520913   | h |
| 8.07726207594627   | -1.35116060558681  | -9.54025543950782   | h |
| 6.72646550262868   | -3.09059834038167  | -5.38438694022262   | h |
| -0.54123504675558  | -7.14235069065010  | -12.37495990655892  | h |
| 3.22984459746362   | -6.41936953373380  | -15.069953191113356 | h |
| 3.66211120344657   | 1.33740687002675   | -12.39439716224311  | h |
| -0.06342799823521  | 0.59976825791771   | -9.62721373821236   | h |
| 3.92739373427441   | 10.64917329695813  | -12.49936415451459  | h |
| 2.19264710264922   | 11.81847213097806  | 3.30738744008226    | h |
| 4.88903268546404   | 4.69689790683262   | -5.18850602995260   | h |
| 6.67070904054089   | 3.54551682198295   | -9.39453809644281   | h |
| 6.89106345949804   | 11.82066440364690  | -5.35823235134409   | h |
| 10.38651255499115  | 14.20490832956608  | -3.28850667417744   | h |
| 10.59539590210133  | 14.51481712002386  | 1.44167090393476    | h |
| 7.30804989722937   | 12.33818182546368  | 4.09574966675447    | h |
| 3.82333447124650   | 9.92227512097793   | 2.04333799408316    | h |
| 9.69886127919165   | 4.28646221164281   | -2.78965494096918   | h |
| 13.81491648024288  | 6.42655656692603   | -1.91119466539716   | h |
| 14.78905371725790  | 8.03875780099960   | 2.44830389781849    | h |
| 11.57709157993294  | 7.52696977468088   | 5.91569991898815    | h |
| 7.44673983644451   | 5.42254080889413   | 5.03024289393473    | h |
| 1.74793121801630   | 8.44363036548089   | 6.69307870213715    | h |
| 2.87462148924704   | 12.94526066504488  | 7.46927780945246    | h |
| 6.32861709472933   | 14.05463468466951  | 10.54850629141439   | h |
| 8.64330608517690   | 10.59573423307613  | 12.82881822109439   | h |
| 7.48078058956479   | 6.09009904016327   | 12.12051147673599   | h |
| -1.17857363230387  | 10.46623000162235  | 1.25806349211538    | h |
| -4.22741053028521  | 6.42967009629556   | 7.73757835982761    | h |
| -5.29040870571512  | 10.53649696780865  | 9.79415072578682    | h |
| -4.25579341751862  | 14.63620874967550  | 7.62723140301449    | h |
| -2.19102946383191  | 14.57500375099952  | 3.34574385206282    | h |
| -2.94592466235598  | 9.36147264949972   | -4.93740555438167   | h |
| -5.94375865639813  | 12.86588298909894  | -5.87480380922034   | h |
| -4.63731693530618  | 17.38718918203112  | -5.18009534635819   | h |
| -0.28191279424828  | 18.35140620511321  | -3.55990771118469   | h |
| 2.75738410807334   | 14.86363877694159  | -2.69326964917248   | h |
| -6.63224404171708  | 8.28890382711684   | -1.37534551464520   | h |
| -7.22524729062225  | 12.90779352132444  | -0.63299329694805   | h |
| -10.43248307946619 | 14.42844978250008  | 2.52515380341398    | h |
| -13.02285287338663 | 11.28305132103058  | 4.95508114626061    | h |
| -12.46086585716619 | 6.66286483079131   | 4.20532573324228    | h |
| -9.69948490051458  | 4.68129083093421   | 12.58769022087813   | h |
| -11.66857658706133 | 8.95087512858928   | 12.78033825303268   | h |
| -11.06688925627283 | 11.69224014482833  | 16.61679974116676   | h |
| -8.46967476114145  | 10.10587174815609  | 20.25730723727577   | h |
| -6.45656275246687  | 5.85319280686517   | 20.06602636306267   | h |
| -16.46919914033991 | 2.72413890700669   | 8.96138556158282    | h |
| -19.29423963429595 | 6.02153225315749   | 10.76568060782329   | h |
| -19.32021954836109 | 6.86111836281698   | 15.43615159112966   | h |
| -16.46608778083838 | 4.37232000083744   | 18.29622471772297   | h |

Supplementary Material (ESI) for Dalton Transactions  
This journal is (c) The Royal Society of Chemistry 2010

|                     |                    |                    |   |
|---------------------|--------------------|--------------------|---|
| -13.60428501562590  | 1.06853542826397   | 16.49950809614480  | h |
| -8.77998138297348   | 0.20727985826394   | 20.68524618401477  | h |
| -7.23632893408371   | -0.29629314074516  | 25.11874694319124  | h |
| -2.65775873721019   | 0.41852162051243   | 26.14562644852310  | h |
| 0.36576658249707    | 1.64526239692675   | 22.70244293708644  | h |
| -1.17032904294802   | 2.22834678908926   | 18.28410155965272  | h |
| -11.99215872260890  | -7.49163816644300  | 13.65175311932300  | h |
| -14.51634519465424  | -11.32189335819831 | 14.74844149916560  | h |
| -12.50931478971351  | -14.89708454346242 | 17.15423623869933  | h |
| -7.94434055180937   | -14.61761934340523 | 18.41559955796848  | h |
| -5.40049532431203   | -10.81303538822141 | 17.30894903012862  | h |
| -6.40115830785891   | -5.95752938328318  | 19.88411492033458  | h |
| -2.82225429937996   | -5.74324795725394  | 22.92839341667190  | h |
| 1.65591430965045    | -5.61710344240021  | 21.35765252233304  | h |
| 2.51043386437090    | -5.67890257811447  | 16.68612230376298  | h |
| -1.05628609590485   | -5.96460216160635  | 13.62422885112234  | h |
| -3.92179741175527   | -10.65738630178050 | 12.51862503158696  | h |
| -2.17957101200700   | -11.82668090506985 | 8.32962500712577   | h |
| -6.65306228719051   | -3.55060400021034  | 9.41079359234484   | h |
| -4.86172825771092   | -4.70069061856578  | 5.20852545882160   | h |
| -8.05441471910672   | 1.34381222066323   | 9.56644767389546   | h |
| -6.69507857641169   | 3.07452680761340   | 5.40955225549386   | h |
| -13.95151627253577  | 0.96015340975807   | 2.16602872007465   | h |
| -15.25616456374467  | -0.87949130230945  | 6.27515259831384   | h |
| -18.25249936665413  | -1.88965669110347  | 12.65598756261356  | h |
| -21.07265069214691  | -5.55838843679076  | 11.76389771951081  | h |
| -19.453107873110195 | -9.28433165264901  | 9.31231790985667   | h |
| -14.95965507202646  | -9.31371399994680  | 7.76583303415989   | h |
| -12.11333531088812  | -5.66777998778150  | 8.67099947362859   | h |
| -9.68279542044010   | -4.29445323772748  | 2.78095167986514   | h |
| -13.79214294726393  | -6.43950090048106  | 1.88131862204663   | h |
| -14.73814000617600  | -8.06119005967597  | -2.48066266337467  | h |
| -11.51388793952413  | -7.53521095348320  | -5.93443079500713  | h |
| -7.38558396241996   | -5.43700906404557  | -5.02471552609509  | h |
| -6.87962229642829   | -11.81799949303180 | 5.37232167574808   | h |
| -10.37067231696812  | -14.20353920676225 | 3.29652945550098   | h |
| -10.57479536579694  | -14.50841663156009 | -1.43412536143374  | h |
| -7.27659621572019   | -12.34107370399367 | -4.08231409426891  | h |
| -3.79225932800297   | -9.92975127716358  | -2.023666174702863 | h |
| -10.57845890742762  | -0.62300159386765  | -2.51160846468709  | h |
| -14.15606777853429  | -1.56540936065842  | -5.41323549298337  | h |
| -17.43143929652711  | 1.76049664661405   | -6.34172049596313  | h |
| -17.10517678232039  | 6.01903991896270   | -4.27199258656443  | h |
| -13.57106669242425  | 6.95768047861936   | -1.30973876000619  | h |
| -7.98149700938597   | 4.79120462911017   | -4.99259651186509  | h |
| -10.21575296568611  | 7.56207815108893   | -8.08796149597694  | h |
| -7.87815843236931   | 9.34278901889580   | -11.82526651437110 | h |
| -3.274674411725165  | 8.34595681982987   | -12.40471439367557 | h |
| -1.02679093538323   | 5.58394102132798   | -9.29280938471384  | h |
| -7.98323859619810   | -0.97015865564649  | -7.11451061603002  | h |
| -11.42989092256227  | 1.29542659418492   | -9.39438842384091  | h |
| -11.22956656126689  | 1.82524099775504   | -14.11279213765036 | h |
| -7.543200623366887  | 0.06619456142897   | -16.52723767583705 | h |
| -4.11206824459959   | -2.24620217627069  | -14.26638331542896 | h |
| 2.96282678998892    | -9.37868461123198  | 4.97435768280759   | h |
| 5.95948625751911    | -12.88838102335768 | 5.89559585805953   | h |
| 4.65383087524956    | -17.40570989149656 | 5.17411774235340   | h |
| -2.73886604753076   | -14.86822662000082 | 2.69542848684550   | h |
| 0.29588929259652    | -18.36152346967235 | 3.55593480785420   | h |
| 8.00916809315746    | -4.80326069021289  | 5.02780708890688   | h |
| 1.04360540791067    | -5.60524926949799  | 9.30921307192604   | h |
| 3.28378485048280    | -8.37331193804034  | 12.42112797707180  | h |
| 7.88245161689976    | -9.38956424108079  | 11.83698668676271  | h |
| 10.23533989738451   | -7.58147944355049  | 8.12267171852213   | h |
| 8.03836536657735    | 0.96755146360577   | 7.12238896938543   | h |
| 11.47196327619694   | -1.32525859089156  | 9.39402843878891   | h |
| 11.26644881584600   | -1.87493565216811  | 14.11003037605309  | h |
| 7.58262020135273    | -0.11709936531539  | 16.52895079731651  | h |
| 4.14829503385686    | 2.19510436063929   | 14.27252332345805  | h |
| -3.16263856080537   | 6.40105810733587   | 15.09889954957408  | h |
| 0.59975218069512    | 7.12078130076590   | 12.39190872271353  | h |
| 0.09531915443204    | -0.61495243071137  | 9.63124305024262   | h |
| 11.79652449247170   | 3.22426416873647   | -18.16424426197506 | n |
| -11.76348733734950  | -3.19696114846490  | 18.19322499184898  | n |
| -13.09245605291145  | -4.28198464025813  | 19.58887543133999  | c |
| 13.11890096022769   | 4.34209989384115   | -19.54005199842793 | c |
| -14.74766317447976  | -5.64092771085154  | 21.32066557655901  | c |
| -13.82311448556239  | -5.86604613562575  | 23.19327009019550  | h |
| -16.54896729561638  | -4.59289874816703  | 21.58442856191801  | h |
| -15.17985956030998  | -7.54802012285591  | 20.55335943281912  | h |

Supplementary Material (ESI) for Dalton Transactions  
This journal is (c) The Royal Society of Chemistry 2010

|                   |                  |                    |   |
|-------------------|------------------|--------------------|---|
| 14.76461647938457 | 5.74010154329322 | -21.24975722224434 | c |
| 14.69118399707708 | 4.91326480410394 | -23.17944203569108 | h |
| 14.15983917462471 | 7.74914552428492 | -21.35173081539865 | h |
| 16.74990433672699 | 5.66990499695923 | -20.56708553826338 | h |

$[\text{Ag}_8\text{Cu}_2(\text{C}_2\text{C}_6\text{H}_4\text{OMe})_6(\text{PPh}_2\text{C}_6\text{H}_4\text{PPh}_2)_6]^{4+}$  (2)

|                    |                    |                    |    |
|--------------------|--------------------|--------------------|----|
| -0.71096686942383  | -5.40564335749216  | 0.93620881767963   | ag |
| 4.90075894753914   | -2.39955685977593  | 0.63141804667068   | ag |
| -2.52413689719458  | -2.32157399175474  | -4.40084385343914  | ag |
| 9.10785080159924   | 1.86500719841523   | -14.40657932214494 | ag |
| -1.39004849354862  | -0.33578816193824  | 2.19488754769813   | cu |
| -2.30018084000805  | -9.21045938808436  | 3.20192320675321   | p  |
| 9.19947073206143   | -3.83309752078000  | -0.57632373084603  | p  |
| -3.47832951714730  | -3.67780480720327  | -8.78565796311399  | p  |
| 12.74755277788936  | 0.86139682082872   | -11.45138663230792 | p  |
| 6.41984770664152   | -1.83961438646816  | -16.00271764991599 | p  |
| -6.70052695747133  | -6.10656652480516  | 14.35950574476839  | p  |
| 0.71873262726322   | 5.32965047167866   | -0.96483845378447  | ag |
| -4.89069396341186  | 2.32191009142327   | -0.65297538176637  | ag |
| 2.53847170328875   | 2.24448671517507   | 4.37077750455191   | ag |
| -9.09855127527199  | -1.93228556792462  | 14.37736935489070  | ag |
| 1.40257219455363   | 0.25525646759143   | -2.22488076031583  | cu |
| 2.30701878797235   | 9.13470332974811   | -3.23066881940518  | p  |
| -9.18693135009249  | 3.76495808803758   | 0.55218721118908   | p  |
| 3.49453429557774   | 3.59519826124295   | 8.75623194106801   | p  |
| -12.74050008228979 | -0.94175430410725  | 11.42138654663906  | p  |
| -6.40752445390849  | 1.77009030438333   | 15.97128784384641  | p  |
| 6.70337175216587   | 6.03552881725831   | -14.39143413825732 | p  |
| -4.08961685228122  | -2.20633565910638  | 0.30015819456338   | c  |
| -5.98094363473602  | -3.41539308682912  | -0.53270086531410  | c  |
| -8.29135692929413  | -4.71365146860662  | -1.05968886106160  | c  |
| -8.90867150238019  | -5.67083281242379  | -3.48551200329437  | c  |
| -11.22002142823163 | -6.87407769011217  | -3.96265776076914  | c  |
| -12.99949963305372 | -7.17757274231926  | -1.99109054482033  | c  |
| -12.40593427937785 | -6.24366913382095  | 0.44956036045655   | c  |
| -10.11114510531465 | -5.04100730675317  | 0.90525584019336   | c  |
| 1.44224530522997   | -2.25982112473742  | 3.83791740853278   | c  |
| 3.00564152006356   | -3.54191906156840  | 5.12971982214155   | c  |
| 4.35679217769023   | -5.05485954857648  | 6.91906214239996   | c  |
| 3.05866607264734   | -6.04547928739162  | 9.06604000872000   | c  |
| 4.29288827697399   | -7.56705849911969  | 10.82189987679557  | c  |
| 6.88757085163917   | -8.16852941479732  | 10.52761675815975  | c  |
| 8.20633610415104   | -7.20637511500700  | 8.41127292987638   | c  |
| 6.94967738189740   | -5.67600270733620  | 6.65136518185477   | c  |
| 1.65329719703271   | -3.51843206516643  | -2.67528165233516  | c  |
| 2.02267509152646   | -5.81563700048959  | -3.26409461921982  | c  |
| 2.64606783086831   | -8.20746272702451  | -4.36209398110850  | c  |
| 2.06768637206703   | -10.54805837926386 | -3.19230931509276  | c  |
| 2.65502771247040   | -12.86256894487465 | -4.33953118264259  | c  |
| 3.87472686618936   | -12.90359032750847 | -6.71795391814294  | c  |
| 4.47389641690199   | -10.57966672580475 | -7.91059220524895  | c  |
| 3.87057047909084   | -8.28981263183081  | -6.76510595016532  | c  |
| 9.53137745867588   | -7.21368850867057  | -1.37579253713166  | c  |
| 11.32676066339012  | -8.06469529098694  | -3.16103391064188  | c  |
| 11.66556019214432  | -10.66286615984520 | -3.58165781570061  | c  |
| 10.22165374120299  | -12.43326902931657 | -2.22527887010019  | c  |
| 8.41709164554715   | -11.59776085610996 | -0.46598528365063  | c  |
| 8.06348552747068   | -8.99981141243605  | -0.04876655369107  | c  |
| 11.83843017579873  | -3.27696702081371  | 1.65730914080960   | c  |
| 12.00632450522767  | -0.89854702448955  | 2.86076327865602   | c  |
| 14.01826259559752  | -0.36740803169616  | 4.50945257398105   | c  |
| 15.85959630167740  | -2.21692810738813  | 5.01496648567976   | c  |
| 15.67935347053999  | -4.60098623856948  | 3.85915855167989   | c  |
| 13.68634429868368  | -5.13154488971644  | 2.18285470226930   | c  |
| -5.86370369836178  | -1.80660166659006  | -10.51385904103922 | c  |
| -5.75932561677613  | -1.51460811579055  | -13.16735024292334 | c  |
| -7.70303750963751  | -0.24168795376242  | -14.44984705321344 | c  |
| -9.76690819523093  | 0.74826434050569   | -13.10033393194592 | c  |
| -9.86852937229792  | 0.48571811939151   | -10.46022776187310 | c  |
| -7.92114012226783  | -0.77519233991323  | -9.16906571062059  | c  |
| -4.48869721418298  | -6.98590010072044  | -9.31897527159279  | c  |
| -6.42433527872318  | -7.63810659996042  | -11.03870612069199 | c  |
| -7.07685473963539  | -10.18622580998703 | -11.41772947137787 | c  |
| -5.79889274846023  | -12.10659134031997 | -10.10162587935879 | c  |
| -3.87909817817010  | -11.46808808084302 | -8.37736424350553  | c  |
| -3.24229135103378  | -8.92335101633066  | -7.96809355811669  | c  |

Supplementary Material (ESI) for Dalton Transactions  
This journal is (c) The Royal Society of Chemistry 2010

|                    |                    |                    |   |
|--------------------|--------------------|--------------------|---|
| -0.63261830739059  | -3.32613458330297  | -10.80559440238403 | c |
| 0.58069963478528   | -0.94786931866264  | -10.84426235145775 | c |
| 2.67847230193021   | -0.53583605142447  | -12.41142057365579 | c |
| 3.65030350862442   | -2.49097732963298  | -13.94762457608340 | c |
| 2.47024245355424   | -4.88213557930094  | -13.86015279556366 | c |
| 0.342984902808064  | -5.29188979355380  | -12.31947029772314 | c |
| 5.05936182112771   | -1.31349831300690  | -19.17520184311603 | c |
| 6.73281884349465   | -0.55538606305700  | -21.11639677881916 | c |
| 5.85673741433703   | -0.26865862340315  | -23.60402791702852 | c |
| 3.29495125416310   | -0.69164448322024  | -24.17458319095863 | c |
| 1.61501427807871   | -1.39814825691569  | -22.24416967612641 | c |
| 2.48900244100266   | -1.71687198115776  | -19.75485672654706 | c |
| 7.90732195774892   | -4.99709596626901  | -16.29197520570515 | c |
| 7.59575014058211   | -6.54136802433402  | -18.44642722656907 | c |
| 8.73513104675099   | -8.94020965688973  | -18.55009577621568 | c |
| 10.18483408032465  | -9.82375221393959  | -16.50920822489475 | c |
| 10.50688361566983  | -8.29297880443220  | -14.36004785187771 | c |
| 9.38917719089201   | -5.88915355986651  | -14.25723038137404 | c |
| 14.79890486161514  | -1.70489607572021  | -12.65346744710372 | c |
| 16.33086474757120  | -3.20443676369428  | -11.06125208415435 | c |
| 17.92818603774128  | -5.05448036700622  | -12.09699920417271 | c |
| 18.01934851702947  | -5.42477179037836  | -14.72754777162336 | c |
| 16.49268137470113  | -3.94919531627496  | -16.32110730193573 | c |
| 14.88115270798303  | -2.10667529824134  | -15.29114563071695 | c |
| 14.98477322366614  | 3.45174093819564   | -10.72801512270925 | c |
| 17.51795021948724  | 3.42119108472505   | -11.56276597120288 | c |
| 19.12811684999893  | 5.46953641025002   | -11.03205765180648 | c |
| 18.23241348968753  | 7.55934198023421   | -9.66237303793498  | c |
| 15.70500064775424  | 7.60688751848889   | -8.83442420190951  | c |
| 14.08510016428143  | 5.57625823746784   | -9.37589481856564  | c |
| 11.76455083722661  | -0.22527630035022  | -8.26624029419678  | c |
| 9.33530654780415   | -1.29020022816945  | -7.95170603802155  | c |
| 8.57656264085541   | -2.27580839331323  | -5.60949303289564  | c |
| 10.24811495872849  | -2.25876685139688  | -3.52793313603369  | c |
| 12.64339682775525  | -1.12434317529073  | -3.81061969000563  | c |
| 13.38335931954100  | -0.09936776715185  | -6.14795363046565  | c |
| -5.09185927630498  | -10.76773083130236 | 1.79865514516972   | c |
| -5.27354304478173  | -10.90305988565267 | -0.85815173589320  | c |
| -7.24104716155619  | -12.27191284714680 | -1.99846146260848  | c |
| -9.05925877046669  | -13.49519564975602 | -0.49861469489311  | c |
| -8.91491210105178  | -13.33236814195669 | 2.14876070987014   | c |
| -6.94175075627166  | -11.97780622271572 | 3.29668925403755   | c |
| -0.10523791093605  | -11.88639552298655 | 3.74615668752789   | c |
| 2.36972451743219   | -11.34472469858800 | 4.59124117789862   | c |
| 4.07175484385117   | -13.31461780803057 | 5.11009406748080   | c |
| 3.34288287496600   | -15.84521836338083 | 4.74598510147575   | c |
| 0.90018328353522   | -16.39548211139665 | 3.86201442627063   | c |
| -0.82156905079612  | -14.43111906958787 | 3.36955416530151   | c |
| -3.40458945548037  | -8.37988411390443  | 6.42695992469662   | c |
| -4.65612448426596  | -6.05181032905928  | 6.77915892311005   | c |
| -5.63390303655699  | -5.39944522741262  | 9.16171486852686   | c |
| -5.35770245906346  | -7.03569294857878  | 11.24983778384604  | c |
| -4.09222032125244  | -9.35967034652042  | 10.89302077163740  | c |
| -3.12130607531418  | -10.02193533488570 | 8.51357256508775   | c |
| -3.95658205669068  | -6.07469997184212  | 16.51918315493368  | c |
| -1.43139642771624  | -6.02440244730532  | 15.66475342652769  | c |
| 0.57471623263068   | -5.89932503678345  | 17.40462093002205  | c |
| 0.08329757730663   | -5.83487467288799  | 20.01079843422457  | c |
| -2.42960395495251  | -5.85782711009129  | 20.87661664088316  | c |
| -4.43625836091157  | -5.95203223697206  | 19.14710950132102  | c |
| -8.49181070193280  | -8.94984935653783  | 15.33377559192626  | c |
| -11.06101447412146 | -9.10995626055131  | 14.62744072371912  | c |
| -12.48743850968767 | -11.26693540409363 | 15.23291448218502  | c |
| -11.37151774826100 | -13.27147549954858 | 16.57481874954521  | c |
| -8.82155976797908  | -13.11343660021061 | 17.30448316602219  | c |
| -7.38282400371308  | -10.96746342697155 | 16.68775986893838  | c |
| 4.09917423259069   | 2.13021030682254   | -0.33253411157876  | c |
| 5.98952104276823   | 3.34110872158002   | 0.49984047497594   | c |
| 8.29916222766539   | 4.64137952150394   | 1.02534587674678   | c |
| 8.91786146439931   | 5.59775246159954   | 3.45112211502470   | c |
| 11.22880195322265  | 6.80232021018060   | 3.92696024990181   | c |
| 13.00618836550839  | 7.10844481588343   | 1.95391958186190   | c |
| 12.41101313208650  | 6.17580162478906   | -0.48681244026757  | c |
| 10.11675584185685  | 4.97159049639631   | -0.94114825347871  | c |
| -1.43185334172018  | 2.17687530523796   | -3.86877142695733  | c |
| -2.99329061175033  | 3.46358634289865   | -5.15804565087755  | c |
| -4.34596111081310  | 4.98033923141398   | -6.94295126496737  | c |
| -3.04973887424396  | 5.97756926373216   | -9.08802743777610  | c |
| -4.28615563140301  | 7.50250889609537   | -10.83950291223177 | c |
| -6.88121436518143  | 8.10100833330978   | -10.54243448795100 | c |

Supplementary Material (ESI) for Dalton Transactions  
This journal is (c) The Royal Society of Chemistry 2010

|                     |                    |                   |   |
|---------------------|--------------------|-------------------|---|
| -8.19807664394289   | 7.13241313420373   | -8.42782614775334 | c |
| -6.93924072857623   | 5.59862242844312   | -6.67248798240705 | c |
| -1.63827058468950   | 3.43791709798886   | 2.64692025902562  | c |
| -2.00630427585394   | 5.73482861779439   | 3.23818549016979  | c |
| -2.62773626001025   | 8.12493125564843   | 4.34103870337317  | c |
| -2.05772353184480   | 10.46734708696674  | 3.17076777035962  | c |
| -2.64299443885437   | 12.77995388759672  | 4.32284751697701  | c |
| -3.85215165058666   | 12.81710718353539  | 6.70673049187472  | c |
| -4.44274813252023   | 10.49130122681691  | 7.89996530099212  | c |
| -3.84141572910301   | 8.20335441035071   | 6.74966328449031  | c |
| -9.51625910554714   | 7.14587516611881   | 1.35088222022960  | c |
| -11.30794107326425  | 7.99848169361570   | 3.13905454611917  | c |
| -11.64556597054741  | 10.597088838645069 | 3.55819750211443  | c |
| -10.20416689803901  | 12.366191713300126 | 2.19749451053835  | c |
| -8.40309752403449   | 11.52901493206583  | 0.43538320066723  | c |
| -8.05053573538217   | 8.93071167807644   | 0.01966141993923  | c |
| -11.82502444620638  | 3.21081604502461   | -1.68296661276338 | c |
| -11.99039439674256  | 0.83452506920006   | -2.89094241379678 | c |
| -14.00176121199373  | 0.30436034796892   | -4.54065948301727 | c |
| -15.84492853583655  | 2.15298134803919   | -5.04272182315577 | c |
| -15.66737155818076  | 4.53495244595871   | -3.88215431790959 | c |
| -13.67493354458288  | 5.06443538800963   | -2.20484136606037 | c |
| 5.87873327058316    | 1.72101008163045   | 10.48285940332509 | c |
| 5.76777104018903    | 1.41578422608811   | 13.13450122091481 | c |
| 7.71171877386960    | 0.14232887335814   | 14.41623244796705 | c |
| 9.78230089946742    | -0.83485120188930  | 13.06781037438427 | c |
| 9.89049251151154    | -0.55916620989277  | 10.42926295481187 | c |
| 7.94292931426268    | 0.70203978417987   | 9.13879832637101  | c |
| 4.50823914913170    | 6.90188140632767   | 9.29180079326003  | c |
| 6.44304206108160    | 7.55042669472226   | 11.01385991660588 | c |
| 7.09748184559036    | 10.09755827943540  | 11.39622399328304 | c |
| 5.82224717394749    | 12.02044522142521  | 10.08113532247490 | c |
| 3.90308848341982    | 11.38554734506789  | 8.35481009584369  | c |
| 3.26448154051571    | 8.84182268559972   | 7.94208530792070  | c |
| 0.64840058629491    | 3.24630344268100   | 10.77598028336030 | c |
| -0.57549004978589   | 0.87338766123396   | 10.80493437314382 | c |
| -2.67384647594990   | 0.46370129657907   | 12.37216111654618 | c |
| -3.63576073890394   | 2.41639150890914   | 13.91756699078763 | c |
| -2.44506508652965   | 4.80263152617287   | 13.83985336108337 | c |
| -0.31717591867819   | 5.20965306003492   | 12.29951433943047 | c |
| -5.05015498159411   | 1.24464546384741   | 19.14519522735072 | c |
| -6.72976441616435   | 0.51232076994485   | 21.09117669051453 | c |
| -5.853704338035940  | 0.22397713209898   | 23.57858660088208 | c |
| -3.28647964570993   | 0.61957883147281   | 24.14455821587564 | c |
| -1.60122205800012   | 1.30054239199780   | 22.20970320644561 | c |
| -2.47470041263482   | 1.62071200200225   | 19.72035675743639 | c |
| -7.89063366718147   | 4.93023461431624   | 16.25599418896575 | c |
| -7.57599287905309   | 6.47814456739953   | 18.40742575518459 | c |
| -8.71164044612093   | 8.87893184789105   | 18.50689997522780 | c |
| -10.16052665905964  | 9.76093277447237   | 16.46472479950478 | c |
| -10.485558645766579 | 8.22662546932628   | 14.31855979489053 | c |
| -9.37167440959534   | 5.82081851096187   | 14.21999731018601 | c |
| -14.80285790789405  | 1.61423970716401   | 12.62609872344732 | c |
| -16.37676063890197  | 3.07716577954887   | 11.04048512727669 | c |
| -17.97955586402901  | 4.92034288190295   | 12.07948327764936 | c |
| -18.03442753747415  | 5.32029206021704   | 14.70689736962634 | c |
| -16.46628211335535  | 3.88149464209708   | 16.29360258157728 | c |
| -14.84957423292674  | 2.04551675957700   | 15.25973101253513 | c |
| -14.96658864554674  | -3.54034235763227  | 10.69396151329320 | c |
| -17.48790490023450  | -3.53860355418598  | 11.56463499242052 | c |
| -19.08961782760905  | -5.59381180506532  | 11.03522135397100 | c |
| -18.19732378585608  | -7.66234840689104  | 9.63140832461169  | c |
| -15.68129355467878  | -7.68183260964160  | 8.76841829218512  | c |
| -14.06957102018857  | -5.64422996405273  | 9.30810491820986  | c |
| -11.75783398191328  | 0.15142335991740   | 8.23807825205925  | c |
| -9.32911394609359   | 1.21840584597655   | 7.92652429959314  | c |
| -8.56897423544448   | 2.20719077089676   | 5.58609675067001  | c |
| -10.23856674374808  | 2.19117975007255   | 3.50302291104856  | c |
| -12.63364854135466  | 1.05554325864684   | 3.78276566435920  | c |
| -13.37487386563628  | 0.02744674723492   | 6.11826697190390  | c |
| 5.09929297115249    | 10.69024024976374  | -1.82641708648262 | c |
| 5.27927731737230    | 10.82668315723128  | 0.83044596882557  | c |
| 7.24707224793460    | 12.19451418434617  | 1.97145275802824  | c |
| 9.06706924413446    | 13.41598773389680  | 0.47230252672149  | c |
| 8.92448063650137    | 13.25188530423444  | -2.17506686011704 | c |
| 6.95103795151153    | 11.89833747748435  | -3.32370156132378 | c |
| 0.11393758261614    | 11.81283465728800  | -3.77263489428513 | c |
| -2.35919932548077   | 11.27484553919252  | -4.62544863027167 | c |
| -4.05922005847640   | 13.24705683612708  | -5.14208642509014 | c |
| -3.33034411954657   | 15.77623216131680  | -4.76813782877014 | c |

Supplementary Material (ESI) for Dalton Transactions  
This journal is (c) The Royal Society of Chemistry 2010

|                   |                    |                    |   |
|-------------------|--------------------|--------------------|---|
| -0.88959342154228 | 16.32270308869994  | -3.87651823326383  | c |
| 0.83026662798139  | 14.35611902473825  | -3.38630824340721  | c |
| 3.41106746962912  | 8.30578484560972   | -6.45626642321415  | c |
| 4.65630362626594  | 5.97481189306289   | -6.81153495901665  | c |
| 5.63438180354323  | 5.32389442637890   | -9.19440490574540  | c |
| 5.36437825545312  | 6.96447076237242   | -11.27994241182293 | c |
| 4.10546425348662  | 9.29156343873863   | -10.91999889100946 | c |
| 3.13453279896364  | 9.95245943330134   | -8.54017219095882  | c |
| 3.95398130405903  | 5.99332511202913   | -16.54429093760787 | c |
| 1.43064340952425  | 5.94823163999420   | -15.68431073996456 | c |
| -0.57923521193085 | 5.81750772384242   | -17.41943576739170 | c |
| -0.09327233190332 | 5.74293137830315   | -20.02635793932529 | c |
| 2.41780510229995  | 5.76138282886903   | -20.89759014166063 | c |
| 4.42816666727208  | 5.86056613750923   | -19.17268492151978 | c |
| 8.48195317514478  | 8.88329436646165   | -15.37555844235318 | c |
| 11.05320292297545 | 9.05378798738369   | -14.67906951905047 | c |
| 12.46994138622802 | 11.21397024857522  | -15.29465638153321 | c |
| 11.34230281952007 | 13.21189198883816  | -16.63632842225683 | c |
| 8.79008795660996  | 13.04378176862611  | -17.35632167710032 | c |
| 7.36099145010239  | 10.89412598959403  | -16.72998559735603 | c |
| -3.58496333919490 | -1.40961010062973  | 12.39046224149628  | h |
| 2.60968589654136  | -0.47240795743390  | -26.12963053210257 | h |
| -0.39535602711427 | -1.72752883650023  | -22.68040459559115 | h |
| 7.18331675150443  | 0.28640168917140   | -25.11179217265379 | h |
| 8.74074025060039  | -0.20445975998132  | -20.68111914266123 | h |
| 1.15595507636348  | -2.29643906386539  | -18.26438921556191 | h |
| -7.42855697556929 | -6.15730417808775  | -12.10182382240837 | h |
| -8.58448835896528 | -10.67077723010409 | -12.77166027719361 | h |
| -6.29777239795157 | -14.10359077758692 | -10.42423204004882 | h |
| -2.86085962174549 | -12.95687028908167 | -7.33605092030007  | h |
| -1.73597442538314 | -8.44915869540694  | -6.60731790030846  | h |
| 9.68768785913754  | -4.69462275624130  | -12.57596612251980 | h |
| 11.66437191402005 | -8.96044989749219  | -12.76230189452768 | h |
| 11.07875931093291 | -11.70318397169367 | -16.59975146576932 | h |
| 8.48233988968731  | -10.12521136883741 | -20.24478971643213 | h |
| 6.46120468855576  | -5.87603323749201  | -20.05961852521417 | h |
| 1.01801196858009  | 6.03493750803987   | -13.64562462302442 | h |
| -2.54113766617860 | 5.78759989088613   | -16.71916603465851 | h |
| -1.66962594616297 | 5.66839857834186   | -21.38570662340987 | h |
| 2.81659103115904  | 5.69195195080945   | -22.93993351934165 | h |
| 6.38699999942679  | 5.85790141573873   | -19.88274571593476 | h |
| 5.36793763308575  | 10.78192658487898  | -17.32386730335692 | h |
| 7.89886879793939  | 14.59974391865761  | -18.41707394892244 | h |
| 12.45551320124382 | 14.90264600127094  | -17.12886711412205 | h |
| 14.47104104600412 | 11.32990566729025  | -14.72640423360188 | h |
| 11.95931239369285 | 7.48825855662721   | -13.64231098145660 | h |
| 18.25237250120559 | 1.78433446295323   | -12.61887768201760 | h |
| 21.10623902480568 | 5.41696368225334   | -11.68375202606716 | h |
| 19.50408885242773 | 9.15320985973134   | -9.23615641075631  | h |
| 14.98644340815770 | 9.24424829814326   | -7.76473500604462  | h |
| 12.10370669139500 | 5.64153788733632   | -8.72614243179431  | h |
| 16.28849760309323 | -2.93699412863992  | -8.99683207307870  | h |
| 19.12135456314068 | -6.20947368941873  | -10.83863229839774 | h |
| 19.28135200383576 | -6.87232163215595  | -15.53476586703380 | h |
| 16.54288964980101 | -4.24320075269198  | -18.38241104381608 | h |
| 13.67021058785889 | -0.96954125337833  | -16.54857775866239 | h |
| 4.32327971004702  | -6.50826872386120  | -7.73871792288759  | h |
| 5.42037887499027  | -10.63678857839063 | -9.76303583280334  | h |
| 2.17393663622766  | -14.62516198711793 | -3.34908786023862  | h |
| 1.15027371320821  | -10.54524412095854 | -1.32394810656992  | h |
| 12.47950540941287 | -6.69332387685674  | -4.22324964721862  | h |
| 13.07596045810664 | -11.30992206637027 | -4.97177222865845  | h |
| 10.50127516599142 | -14.47187635095878 | -2.55029240151570  | h |
| 7.25758260074203  | -12.97114675251057 | 0.58566515658777   | h |
| 6.62972352529449  | -8.35627656247253  | 1.32176937935255   | h |
| 13.58563326910389 | -7.00155300590935  | 1.27518321788128   | h |
| 17.11421341032791 | -6.06168015036096  | 4.24481648233219   | h |
| 17.43972050542951 | -1.79931645514544  | 6.30714377431292   | h |
| 14.13907172945004 | 1.51069118629550   | 5.40143356774788   | h |
| 10.57536138253852 | 0.56995673481716   | 2.48509812794078   | h |
| 13.96341142478108 | -1.04676111449647  | -2.20275462090764  | h |
| 15.25737905172015 | 0.79519323096381   | -6.31339021014820  | h |
| 8.01041225150810  | -1.34483928467771  | -9.56223525354145  | h |
| 6.66269505402902  | -3.07627008865203  | -5.40094117412931  | h |
| -0.55955835661915 | -7.16770141059424  | -12.31292952998114 | h |
| 3.20344623955055  | -6.45159894838013  | -15.01728015513396 | h |
| 3.58117239991929  | 1.34140269501328   | -12.43713387198839 | h |
| -0.12469351741239 | 0.60419906854539   | -9.64367272401041  | h |
| 3.88668369083995  | 10.62288243822391  | -12.50745538233430 | h |
| 2.15830536952182  | 11.77747587041747  | -8.30958632074607  | h |



Supplementary Material (ESI) for Dalton Transactions  
This journal is (c) The Royal Society of Chemistry 2010

|                    |                    |                   |   |
|--------------------|--------------------|-------------------|---|
| 4.86661033501868   | 4.65037316492897   | -5.21400159775575 | h |
| 6.63218034400066   | 3.50762014119796   | -9.42983123586758 | h |
| 6.85035153990271   | 11.80122530403452  | -5.40134961910124 | h |
| 10.35359193377133  | 14.19786090141346  | -3.35970839746018 | h |
| 10.60854356188398  | 14.49438242200108  | 1.36705845702147  | h |
| 7.35695375738769   | 12.28925478091716  | 4.04889964055584  | h |
| 3.86866001315268   | 9.85818383544874   | 2.02196006441370  | h |
| 9.69499857797855   | 4.24346274423230   | -2.84356135196486 | h |
| 13.81325424363150  | 6.42552813321638   | -2.00403680678214 | h |
| 11.61407862379787  | 7.51805102570224   | 5.83959844864377  | h |
| 7.53735634406930   | 5.40311790047668   | 4.99624002227732  | h |
| 1.75888030721430   | 8.37031269902661   | 6.57955479541330  | h |
| 2.88665434457174   | 12.87652361397713  | 7.31487400526557  | h |
| 6.32274649615012   | 14.01664649424765  | 10.40616419991906 | h |
| 8.60416565402097   | 10.57935723726272  | 12.75218966920111 | h |
| 7.44513668516531   | 6.06744818240734   | 12.07599820141994 | h |
| -1.14882001441192  | 10.46750136351296  | 1.29821912635398  | h |
| -4.28722128863893  | 6.42026590636821   | 7.72368094680698  | h |
| -5.38096879161939  | 10.54541628181294  | 9.75669552253235  | h |
| -2.16856708795808  | 14.54412719703401  | 3.33201559134555  | h |
| -2.95701223708784  | 9.30032224547497   | -4.92162629635225 | h |
| -5.96705836146319  | 12.79677999866265  | 5.84532917079695  | h |
| -4.66429988322396  | 17.32378960123730  | -5.17602086959793 | h |
| -0.30265487620652  | 18.29945999270988  | -3.57823568393859 | h |
| 2.74389786143933   | 14.81748031507948  | -2.71066477682230 | h |
| -6.61958317832910  | 8.28595867741512   | -1.35324341081354 | h |
| -7.24563334188839  | 12.90139618581357  | -0.61984802459825 | h |
| -10.48288500893079 | 14.40511035339676  | 2.52137943771832  | h |
| -13.05333678321510 | 11.24540856630981  | 4.95039204039973  | h |
| -12.45891808005813 | 6.62819934629571   | 4.20455994936067  | h |
| -9.67271262495250  | 4.62344303702130   | 12.54119264868482 | h |
| -11.64246599474254 | 8.89291958829020   | 12.71989718685180 | h |
| -11.05151825797313 | 11.64191191218595  | 16.55198809418223 | h |
| -8.45657128650034  | 10.06669881350868  | 20.19931773079974 | h |
| -6.44189666592142  | 5.81420220578549   | 20.02151332573131 | h |
| -16.36343499447244 | 2.78632461724555   | 8.97886495241854  | h |
| -19.20533219066765 | 6.04681838384720   | 10.82665122073074 | h |
| -19.30083834390181 | 6.76255633319190   | 15.51669429473394 | h |
| -16.48784381589583 | 4.19936555460808   | 18.35185419996354 | h |
| -13.60507580384300 | 0.93693789327407   | 16.50988349963042 | h |
| -8.74242212669960  | 0.18364128044115   | 20.66054811594311 | h |
| -7.18483880989483  | -0.31012401971779  | 25.08991225600470 | h |
| -2.60130104164474  | 0.39927438484884   | 26.09951184626836 | h |
| 0.41330336523532   | 1.60864295630424   | 22.64226177768315 | h |
| -1.13699481577780  | 2.17987623675873   | 18.22632027963292 | h |
| -11.95751610281371 | -7.53985233997200  | 13.58924298248887 | h |
| -14.48585792283219 | -11.37614868531499 | 14.65360984675769 | h |
| -12.49205950625037 | -14.95961004711062 | 17.05959639271179 | h |
| -7.93959539553040  | -14.67462217672435 | 18.36525901932650 | h |
| -5.39145527974744  | -10.86355971277052 | 17.28881176201903 | h |
| -6.39660044731459  | -5.95328312455495  | 19.85282844190193 | h |
| -2.83262986262358  | -5.79612547601544  | 22.91839503146473 | h |
| 1.65675786912872   | -5.76473017975604  | 21.37372710946199 | h |
| 2.53808705930623   | -5.86578643920438  | 16.70861511956500 | h |
| -1.01429953308064  | -6.10253470004795  | 13.62661387835976 | h |
| -3.86828186844415  | -10.68760482650937 | 12.48259374079917 | h |
| -2.13983231676239  | -11.84442213166431 | 8.28541932922714  | h |
| -6.63622700825682  | -3.58538401369480  | 9.39501894752262  | h |
| -4.87148801708634  | -4.73079200425652  | 5.17947266473960  | h |
| -8.00528653590443  | 1.27118010587454   | 9.53798052133594  | h |
| -6.65539716231166  | 3.00900773910052   | 5.38021412111380  | h |
| -13.95215269174489 | 0.97851417658190   | 2.17364610135107  | h |
| -15.24790509755108 | -0.86974381631559  | 6.28022418352804  | h |
| -18.22010686750027 | -1.91866058887722  | 12.64798644523394 | h |
| -21.05870690870475 | -5.56322633549969  | 11.71499824882164 | h |
| -19.46280947966864 | -9.26130085151940  | 9.20580208523761  | h |
| -14.96513875071982 | -9.30244115682486  | 7.67193577035141  | h |
| -12.09692745388015 | -5.68816143237007  | 8.63065934503693  | h |
| -9.69069178543530  | -4.31161177300253  | 2.80749172351228  | h |
| -13.80994434466632 | -6.49117671017094  | 1.96552446326044  | h |
| -11.60404982330333 | -7.59082511939175  | -5.87516498579076 | h |
| -7.52683784737280  | -5.47773281604275  | -5.02963030506050 | h |
| -6.83995637065778  | -11.88106029370789 | 5.37432541729243  | h |
| -10.34214205889902 | -14.28052469083359 | 3.33393541557816  | h |
| -10.60087535123631 | -14.57385614427838 | -1.39281128940575 | h |
| -7.35176616760185  | -12.36643728246270 | -4.07587642390993 | h |
| -3.86475752749048  | -9.93259088925593  | -2.05021442893044 | h |
| -10.55768060875749 | -0.63302308550644  | -2.51815207545169 | h |
| -14.12074261552151 | -1.57224263198765  | -5.43602198548194 | h |
| -17.42423790939917 | 1.73641488573556   | -6.33623200861872 | h |

Supplementary Material (ESI) for Dalton Transactions  
This journal is (c) The Royal Society of Chemistry 2010

|                    |                    |                    |   |
|--------------------|--------------------|--------------------|---|
| -17.10394722685390 | 5.99474440848821   | -4.26483082695778  | h |
| -13.57608412421057 | 6.93283805866767   | -1.29364807747749  | h |
| -7.99544352164213  | 4.84121450464271   | -5.04687010284602  | h |
| -10.21196767516028 | 7.55197302581680   | -8.13330907113942  | h |
| -3.28028144798126  | 8.29676844118158   | -12.47883752884196 | h |
| -1.02532628421135  | 5.55834126756823   | -9.32851402995158  | h |
| -8.00441094833416  | -0.95566923829556  | -7.09363733793465  | h |
| -11.46688132055357 | 1.27524861610275   | -9.38376891899227  | h |
| -11.29708865694379 | 1.73372691400603   | -14.11410027935494 | h |
| -7.61092595826200  | -0.03336289768752  | -16.52073286413722 | h |
| -4.15689890526806  | -2.29631584746643  | -14.24427243427141 | h |
| 2.96747994781300   | -9.36895327864440  | 4.87929915676699   | h |
| 5.98108657588654   | -12.86134192530565 | 5.80734782292022   | h |
| 4.6784028551470    | -17.39098909267434 | 5.15552748017330   | h |
| -2.73651745982644  | -14.89528313919898 | 2.69951697186093   | h |
| 0.31335345510775   | -18.37340691984999 | 3.57136674148061   | h |
| 8.00744011273184   | -4.92304880468961  | 5.02467776017307   | h |
| 1.03454434866966   | -5.62378912828511  | 9.30464008075101   | h |
| 3.28547043139843   | -8.35648342241034  | 12.46262532636315  | h |
| 10.22028086849481  | -7.62753423275524  | 8.11943509202559   | h |
| 8.03144290347556   | 0.89230413179725   | 7.06447422449938   | h |
| 11.49419240694951  | -1.33864857191684  | 9.35341483929493   | h |
| 11.31260211253436  | -1.82063852025792  | 14.08106903517683  | h |
| 7.61450487043876   | -0.07621437850411  | 16.48583111464893  | h |
| 4.16018002994705   | 2.18766871878558   | 14.21075676838135  | h |
| -3.17073966926676  | 6.37038557921052   | 15.00404091073744  | h |
| 0.59391387839666   | 7.08133166502359   | 12.30071432376024  | h |
| 0.12133097106887   | -0.67605824038837  | 9.59593837432502   | h |
| 11.74619349541546  | 3.20724256382622   | -18.19905415057712 | n |
| -11.70773364827449 | -3.27533837188897  | 18.18771759659566  | n |
| -12.99649838954620 | -4.44999874211500  | 19.54850495280360  | c |
| 13.04820410513974  | 4.37525732052441   | -19.55295614238297 | c |
| -14.60101211955224 | -5.92292522254290  | 21.23426539220134  | c |
| -13.70528077822245 | -6.10533356230339  | 23.12534922012424  | h |
| -16.46943201602137 | -4.99128940520424  | 21.46521565090526  | h |
| -14.89555827064108 | -7.84640387234293  | 20.44285192742974  | h |
| 14.66822372853733  | 5.83648346407710   | -21.23431432148347 | c |
| 14.55883092340925  | 5.08768290238250   | -23.19384661368047 | h |
| 14.06743143324000  | 7.84923974350064   | -21.24455007540007 | h |
| 16.66478122964137  | 5.73452888461982   | -20.58980038339138 | h |
| -4.50988271934390  | 14.92986357298455  | 7.98462819201836   | o |
| 7.90297211095784   | -9.65670334969489  | 12.33975557472795  | o |
| -15.27824905103607 | -8.30981727238922  | -2.23303615892622  | o |
| -7.89858549015866  | 9.59387845230504   | -12.34959932716438 | o |
| 15.28426755825878  | 8.24241939909245   | 2.19448262669400   | o |
| 4.53534756241330   | -15.01844317771859 | -7.99092841021840  | o |
| -10.49554065755605 | 10.28382061750195  | -12.18920701705797 | c |
| -10.89406204348003 | 11.38592835582045  | -10.43853218729021 | h |
| -10.87813148172045 | 11.48586560598775  | -13.85996466023684 | h |
| -11.74740454428769 | 8.59093468158168   | -12.25106951612195 | h |
| -3.96007752688691  | 17.34205435113918  | 6.92598593275899   | c |
| -4.95358776148100  | 17.62348452193244  | 5.08986184557007   | h |
| -4.65517456353671  | 18.75223727052734  | 8.30847188967813   | h |
| -1.88875319257218  | 17.60890347138305  | 6.64829158249505   | h |
| -16.01976646556173 | -9.29206577508988  | -4.62598706789063  | c |
| -17.92672592246088 | -10.11068500836342 | -4.34953770597133  | h |
| -16.12370953957492 | -7.77512013606685  | -6.08450162709125  | h |
| -14.70537083653376 | -10.80211097180003 | -5.28145354184495  | h |
| 3.97693453207456   | -17.42887019899047 | -6.93279002090452  | c |
| 4.67578853259191   | -18.84131201655643 | -8.31106868596801  | h |
| 4.96184345118927   | -17.71042496298342 | -5.09204527261855  | h |
| 1.90397457626668   | -17.69215712949105 | -6.66402236010369  | h |
| 10.49568352961109  | -10.36132329215865 | 12.17484816647430  | c |
| 11.75752441803999  | -8.67591411968061  | 12.23952313857821  | h |
| 10.87315806484649  | -11.56939921049718 | 13.84241874119831  | h |
| 10.88588056681336  | -11.46133641717021 | 10.42103769461385  | h |
| 16.02733135766008  | 9.22335460133291   | 4.587466775613800  | c |
| 16.13329898277112  | 7.70547623333040   | 6.04487383295321   | h |
| 17.93364357801741  | 10.04313706514307  | 4.30998395275052   | h |
| 14.71273138617257  | 10.73227328008855  | 5.24513632822055   | h |

[Ag<sub>8</sub>Cu<sub>2</sub>(C<sub>2</sub>C<sub>6</sub>H<sub>4</sub>NMe<sub>2</sub>)<sub>6</sub>(PPh<sub>2</sub>C<sub>6</sub>H<sub>4</sub>PPh<sub>2</sub>)<sub>6</sub>]<sup>4+</sup> (3)

|                   |                   |                    |    |
|-------------------|-------------------|--------------------|----|
| -0.68393455340306 | -5.34087866095055 | 0.98996476670922   | ag |
| 4.88584699040289  | -2.33210566744029 | 0.64877850894963   | ag |
| -2.51389564530056 | -2.30961287119027 | -4.30387738412413  | ag |
| 9.11465068256650  | 1.87451075700906  | -14.35979277728182 | ag |

Supplementary Material (ESI) for Dalton Transactions  
This journal is (c) The Royal Society of Chemistry 2010

|                     |                    |                    |    |
|---------------------|--------------------|--------------------|----|
| -1.40058286369109   | -0.31045167397849  | 2.23301802934775   | cu |
| -2.24638566825400   | -9.16464018986576  | 3.24312827660926   | p  |
| 9.20443327539280    | -3.75920168580463  | -0.51327186598011  | p  |
| -3.42217300178581   | -3.69786030849171  | -8.69356639317345  | p  |
| 12.74871294933134   | 0.95254288041421   | -11.37937180138888 | p  |
| 6.47114725051032    | -1.87417067002835  | -15.91342155423115 | p  |
| -6.62463725782972   | -6.01012536797865  | 14.39351611339870  | p  |
| 0.71869406152995    | 5.33169157135635   | -0.96850207997878  | ag |
| -4.85586086535510   | 2.32414164344493   | -0.62498639754639  | ag |
| 2.54024965662719    | 2.29644078674929   | 4.33081794577304   | ag |
| -9.08424375655586   | -1.87314615079946  | 14.37782070570539  | ag |
| 1.43171593415601    | 0.29959685006995   | -2.21191095676128  | cu |
| 2.28177497050491    | 9.15707977532211   | -3.21879456831552  | p  |
| -9.17509890648316   | 3.75328940879725   | 0.53171447764166   | p  |
| 3.45238018721065    | 3.69336847607608   | 8.71662791438757   | p  |
| -12.72043191390874  | -0.96450864538023  | 11.39627807793724  | p  |
| -6.44629101959611   | 1.87877325308649   | 15.93082640015162  | p  |
| 6.65564234330040    | 6.01187947458317   | -14.37353190751523 | p  |
| -4.09212194976759   | -2.20406334092983  | 0.31986274448412   | c  |
| -5.99060877092105   | -3.41014975665006  | -0.51148735626268  | c  |
| -8.28935533813371   | -4.70139152377714  | -1.08037091362123  | c  |
| -8.88792955972703   | -5.61833501263537  | -3.53373138733259  | c  |
| -11.18312132802350  | -6.79875216289713  | -4.06542586473030  | c  |
| -13.05460475707256  | -7.15792286091739  | -2.15069484855291  | c  |
| -12.44364806617414  | -6.26632509583549  | 0.32669880720458   | c  |
| -10.145977623360836 | -5.08189423291248  | 0.83284841972848   | c  |
| 1.44030293269268    | -2.21897944295808  | 3.90124969961743   | c  |
| 2.98484356847874    | -3.50838861813470  | 5.21091821345899   | c  |
| 4.37262420454687    | -5.02996951521274  | 6.95620267648609   | c  |
| 3.16360935928079    | -6.04093020235811  | 9.13868875205107   | c  |
| 4.43433962155980    | -7.59838065937970  | 10.84226898917993  | c  |
| 7.03293584564859    | -8.25212635546123  | 10.48595403652057  | c  |
| 8.24939263898516    | -7.23326948970432  | 8.29968693155080   | c  |
| 6.95695823001044    | -5.67780477355742  | 6.61026210384555   | c  |
| 1.70453069160090    | -3.48534527263305  | -2.64189751433642  | c  |
| 2.07324422287067    | -5.77763024727092  | -3.25660679765773  | c  |
| 2.65990269513590    | -8.18363023773144  | -4.32905213384728  | c  |
| 2.02033903536510    | -10.51210195912394 | -3.15088030706005  | c  |
| 2.55219543400071    | -12.83868355533989 | -4.26867329098285  | c  |
| 3.79673987719498    | -12.99656340832512 | -6.66138837365524  | c  |
| 4.44755103716324    | -10.65681100522111 | -7.84795512859230  | c  |
| 3.89557039786817    | -8.34347824035251  | -6.71665186519020  | c  |
| 9.55423491621651    | -7.13501494993130  | -1.32943787675982  | c  |
| 11.41856448602852   | -7.97809884278101  | -3.04705716409633  | c  |
| 11.75640478514296   | -10.57307164164000 | -3.48573750267660  | c  |
| 10.23934018686194   | -12.34858339139455 | -2.21791117127369  | c  |
| 8.36662533925421    | -11.52097178044016 | -0.52821316989824  | c  |
| 8.01710788422834    | -8.92552690912262  | -0.09088286415231  | c  |
| 11.83795960631022   | -3.20082422746072  | 1.72823298169818   | c  |
| 11.99562220564932   | -0.82107926425396  | 2.93070166697768   | c  |
| 13.98129874117128   | -0.29523653808320  | 4.61268589647579   | c  |
| 15.80794769207444   | -2.15011964445489  | 5.15038432995915   | c  |
| 15.64001052725375   | -4.53389487263424  | 3.99207335661782   | c  |
| 13.67194491547999   | -5.06008050473943  | 2.28519364705088   | c  |
| -5.77519064815601   | -1.81617717252762  | -10.45707296165826 | c  |
| -5.68982908974992   | -1.60666945509202  | -13.11931529324794 | c  |
| -7.60698739147610   | -0.31359028492785  | -14.42090686793325 | c  |
| -9.62378321860107   | 0.78234611064336   | -13.08121505696366 | c  |
| -9.70548495464176   | 0.60235291603457   | -10.43403178791586 | c  |
| -7.78499548407248   | -0.68153244962631  | -9.12468622488755  | c  |
| -4.45197690690028   | -7.00136875026004  | -9.23133926299829  | c  |
| -6.43722119959991   | -7.63928625808225  | -10.89897016599227 | c  |
| -7.12190700601596   | -10.18205182393404 | -11.25778972163404 | c  |
| -5.82900767078686   | -12.11219299646685 | -9.97120620184465  | c  |
| -3.85910565488837   | -11.48813133747787 | -8.29890886956814  | c  |
| -3.18789458465354   | -8.94888489045272  | -7.91109059897921  | c  |
| -0.56292485301302   | -3.36815696870446  | -10.70055270365193 | c  |
| 0.66880638890456    | -0.99943798041798  | -10.71910954407134 | c  |
| 2.76743743406352    | -0.59054994242865  | -12.28557928455396 | c  |
| 3.72219085608249    | -2.53895086957037  | -13.84064346384189 | c  |
| 2.53048541462090    | -4.92489930085993  | -13.76548025690839 | c  |
| 0.40235354316994    | -5.33100012745433  | -12.22515133373538 | c  |
| 5.09657075226687    | -1.40705923990355  | -19.09000456795177 | c  |
| 6.75257181527502    | -0.63622537652414  | -21.04121638141071 | c  |
| 5.86906273445376    | -0.39379297092752  | -23.5097878066007  | c  |
| 3.31620321527339    | -0.87589687445464  | -24.09475224307122 | c  |
| 1.65254770099446    | -1.59496567117666  | -22.15490936127204 | c  |
| 2.53429122233523    | -1.86729967845304  | -19.66270431529987 | c  |
| 8.01849552434049    | -5.00663214965608  | -16.18080849673269 | c  |
| 7.73975523226273    | -6.57071969552741  | -18.32547148094890 | c  |

Supplementary Material (ESI) for Dalton Transactions  
This journal is (c) The Royal Society of Chemistry 2010

|                    |                    |                    |   |
|--------------------|--------------------|--------------------|---|
| 8.95182396462022   | -8.93372368428726  | -18.42710962891963 | c |
| 10.44453819700988  | -9.76159972275982  | -16.39377412445731 | c |
| 10.72952547089488  | -8.21370290399855  | -14.25148520264263 | c |
| 9.53661929588530   | -5.84614863794111  | -14.15060946048571 | c |
| 14.86803861432965  | -1.57051566035840  | -12.55574312171892 | c |
| 16.38702104793455  | -3.06082457163128  | -10.94302739331326 | c |
| 18.03232834475829  | -4.87992213500614  | -11.95892584899918 | c |
| 18.18430655308170  | -5.22828877306819  | -14.58951802114178 | c |
| 16.66975722624935  | -3.76240209590457  | -16.20377825123103 | c |
| 15.01056360085323  | -1.95130035287528  | -15.19418291097875 | c |
| 14.91874596859937  | 3.60370754391616   | -10.66881644376422 | c |
| 17.45975645065421  | 3.62471729362102   | -11.47975320304216 | c |
| 19.00987487504014  | 5.72578300092859   | -10.97709054061092 | c |
| 18.04515310586961  | 7.81900331556034   | -9.66023751499675  | c |
| 15.51056154158106  | 7.81322331207040   | -8.85257910025447  | c |
| 13.95133213367068  | 5.72795701537416   | -9.36400715778623  | c |
| 11.76593914485921  | -0.13382132329832  | -8.19789393795199  | c |
| 9.35467227727874   | -1.24276965746149  | -7.89569606426710  | c |
| 8.59989831264171   | -2.23659784764221  | -5.55613193651071  | c |
| 10.25703272832853  | -2.18150598289123  | -3.46346672003835  | c |
| 12.63123248988357  | -1.00105218089318  | -3.73378253167974  | c |
| 13.36861112270318  | 0.02884170516329   | -6.06982303645231  | c |
| -5.03998995897234  | -10.73530427446022 | 1.85640817317898   | c |
| -5.28269712799682  | -10.79516587286490 | -0.79770519098503  | c |
| -7.25455097949457  | -12.16267631126674 | -1.93260878931931  | c |
| -9.01399991050551  | -13.46293642556262 | -0.42828273630534  | c |
| -8.80884506214925  | -13.37748781782160 | 2.21914569570712   | c |
| -6.83373530530259  | -12.02078817020048 | 3.36051588563971   | c |
| -0.04267261555421  | -11.83394079694756 | 3.79281491155424   | c |
| 2.42879761512277   | -11.27862441229182 | 4.63979547449379   | c |
| 4.15009162815721   | -13.23822879078009 | 5.13416249989175   | c |
| 3.44365117803466   | -15.77165359853591 | 4.74606797485889   | c |
| 1.00341731408232   | -16.33512614128861 | 3.86352712742995   | c |
| -0.73644816173426  | -14.38136991152195 | 3.39316601728429   | c |
| -3.35596200127224  | -8.33077377893416  | 6.46696743299105   | c |
| -4.65262932822606  | -6.02409380738966  | 6.79695784871608   | c |
| -5.62823466857783  | -5.36017125920874  | 9.17676676680663   | c |
| -5.30281158645140  | -6.96180830734799  | 11.28485873380418  | c |
| -3.99279355987879  | -9.26416448208153  | 10.95069451150138  | c |
| -3.02605892019377  | -9.93848600627500  | 8.57297171000593   | c |
| -3.84922387961003  | -5.86615388470116  | 16.50806267700235  | c |
| -1.35296029025027  | -5.66407220183927  | 15.59327457099254  | c |
| 0.68208555093392   | -5.40386412004767  | 17.28343875409202  | c |
| 0.25163431810849   | -5.36466111430467  | 19.90111363696835  | c |
| -2.23288846550497  | -5.54859250691600  | 20.82747139491248  | c |
| -4.27116564972260  | -5.77007475791640  | 19.14694252524914  | c |
| -8.34261297488275  | -8.86987054135412  | 15.44892793933474  | c |
| -10.91826850266460 | -9.09307818759267  | 14.78362955904917  | c |
| -12.29426149248340 | -11.26484515400485 | 15.45029193852604  | c |
| -11.12120416686389 | -13.22218488697922 | 16.81313107004616  | c |
| -8.56433298542533  | -13.00207126609505 | 17.50108002020924  | c |
| -7.17626975665422  | -10.84145833489842 | 16.82228666705887  | c |
| 4.12438751536556   | 2.19205403699279   | -0.29791348555860  | c |
| 6.02295514188725   | 3.39926187629715   | 0.53121691982491   | c |
| 8.32185464234080   | 4.69132841630559   | 1.09718920770277   | c |
| 8.92768315885590   | 5.60061627121297   | 3.55161690927307   | c |
| 11.22270348723641  | 6.78352583831383   | 4.07902412647430   | c |
| 13.08249518925789  | 7.16163144138418   | 2.15665525450792   | c |
| 12.47180204045072  | 6.26071487594832   | -0.31741044763125  | c |
| 10.17457400109968  | 5.07376554810517   | -0.81932323807893  | c |
| -1.40699238740687  | 2.20966810057630   | -3.88004388446171  | c |
| -2.95125567208809  | 3.49992453206081   | -5.18895919272439  | c |
| -4.33774703921769  | 5.02779522342538   | -6.92995099564187  | c |
| -3.12806004457287  | 6.04463220247926   | -9.10923732457165  | c |
| -4.39584085516531  | 7.61383043356099   | -10.80441533795611 | c |
| -6.98927549133631  | 8.28162432287719   | -10.43722055868753 | c |
| -8.21218176823058  | 7.24027460203355   | -8.26522036729353  | c |
| -6.92288976461665  | 5.67282307847452   | -6.58455630184891  | c |
| -1.67369541414808  | 3.47442927502154   | 2.66340637937639   | c |
| -2.04327770665490  | 5.76701322970144   | 3.27644616202179   | c |
| -2.63235888612438  | 8.17444651023069   | 4.34421293869372   | c |
| -1.99884715854421  | 10.50090049737146  | 3.15887398608587   | c |
| -2.53633394337237  | 12.82946897677909  | 4.26958930335559   | c |
| -3.78044160724631  | 12.99150047875648  | 6.66225052870333   | c |
| -4.42378708509749  | 10.65377462703595  | 7.85687613116405   | c |
| -3.86630708270288  | 8.33836422490973   | 6.73250658210407   | c |
| -9.52547902743233  | 7.13065476453310   | 1.34086323311712   | c |
| -11.38778659482084 | 7.97677084395089   | 3.05912699197132   | c |
| -11.73054228979086 | 10.57286814861051  | 3.48746079457533   | c |
| -10.22042528287568 | 12.34636681594725  | 2.20860115550813   | c |

Supplementary Material (ESI) for Dalton Transactions  
This journal is (c) The Royal Society of Chemistry 2010

|                    |                   |                    |   |
|--------------------|-------------------|--------------------|---|
| -8.34853206440313  | 11.51569715613682 | 0.51946455290043   | c |
| -7.99406763218965  | 8.91924302429718  | 0.09241864589143   | c |
| -11.80816220607703 | 3.19165783236077  | -1.70960740491745  | c |
| -11.96971441588184 | 0.80786229676049  | -2.90356568941195  | c |
| -13.95778577936535 | 0.27834647347057  | -4.58161012077702  | c |
| -15.78247915936949 | 2.13366025664208  | -5.12441834297996  | c |
| -15.60979647689183 | 4.52178275923837  | -3.97581336526423  | c |
| -13.63953340494404 | 5.05167035949871  | -2.27261530928059  | c |
| 5.80480795177000   | 1.81561171110946  | 10.48515675129543  | c |
| 5.71904297143939   | 1.61313706607541  | 13.14794224650221  | c |
| 7.63729129801214   | 0.32563115595291  | 14.45347376822596  | c |
| 9.65555512557803   | -0.77184647761206 | 13.11723349796165  | c |
| 9.73709008191441   | -0.59974483768792 | 10.46952869263556  | c |
| 7.81548932513816   | 0.67847647377918  | 9.15624549905063   | c |
| 4.48076454111433   | 6.99806147669491  | 9.24890523233667   | c |
| 6.46558693534269   | 7.64008190157004  | 10.91542313934451  | c |
| 7.14610306320515   | 10.18420094963268 | 11.27266582325939  | c |
| 5.84964037429026   | 12.11146810543247 | 9.98536367325861   | c |
| 3.88088333333463   | 11.48319903893563 | 8.31326674857483   | c |
| 3.21389271094474   | 8.94262865403734  | 7.92696449386437   | c |
| 0.59188585611650   | 3.36694400253949  | 10.72229338618609  | c |
| -0.64785002808848  | 1.00246185343860  | 10.73264965447826  | c |
| -2.74781192703497  | 0.59542626371327  | 12.29788765719736  | c |
| -3.69540154268569  | 2.54151991070580  | 13.86006253011370  | c |
| -2.49558006053650  | 4.92364932286845  | 13.79322258349640  | c |
| -0.36649739462889  | 5.32790098236248  | 12.25380813013989  | c |
| -5.07478363311883  | 1.41477448152338  | 19.10916618743417  | c |
| -6.73728307225184  | 0.66872863878093  | 21.06471052613862  | c |
| -5.85384817645633  | 0.42451929560555  | 23.55424158440437  | c |
| -3.29525077016404  | 0.88059879874423  | 24.11397156781557  | c |
| -1.62604430496269  | 1.57564743085557  | 22.17025927133814  | c |
| -2.50721031042406  | 1.84929044641103  | 19.67792602906966  | c |
| -7.99525407680458  | 5.01078909979013  | 16.19356907200106  | c |
| -7.70781161434277  | 6.58350331961111  | 18.33083197467089  | c |
| -8.92112522497917  | 8.94598216971798  | 18.44872997052989  | c |
| -10.42374728183695 | 9.76477428161171  | 16.39896478739805  | c |
| -10.71723829590396 | 8.20840500877099  | 14.26402380476763  | c |
| -9.52294297899834  | 5.84135647300141  | 14.16694886468251  | c |
| -14.85095807882657 | 1.54711835981429  | 12.57622665453983  | c |
| -16.37986065015190 | 3.03107012016674  | 10.96705189890085  | c |
| -18.03271766225633 | 4.84092120136304  | 11.98717187772461  | c |
| -18.18250628353204 | 5.18609888294764  | 14.61834237067033  | c |
| -16.65818836838404 | 3.72648990092958  | 16.22908339470163  | c |
| -14.99143677276577 | 1.92475434776586  | 15.21520326214905  | c |
| -14.87859561975213 | -3.62373824446149 | 10.67977020934434  | c |
| -17.41626584495327 | -3.66219827219652 | 11.50045724380893  | c |
| -18.95710550097695 | -5.76907395638013 | 10.99370123315676  | c |
| -17.98637899404408 | -7.85079394490575 | 9.66308483932878   | c |
| -15.45485379583489 | -7.82786476479609 | 8.84612559515200   | c |
| -13.90474956279244 | -5.73684386818359 | 9.36164813605569   | c |
| -11.73883494390464 | 0.12913798664938  | 8.21685196696039   | c |
| -9.32801710097042  | 1.23923820624924  | 7.91551920172681   | c |
| -8.57297831869931  | 2.23403343779705  | 5.57637761951384   | c |
| -10.22964368312893 | 2.17936360958576  | 3.48335688642540   | c |
| -12.60432708120151 | 0.99967869523806  | 3.75338810979464   | c |
| -13.34156627280165 | -0.03189069165360 | 6.08865081616676   | c |
| 5.07894042911720   | 10.72079349685453 | -1.83124848519752  | c |
| 5.32237866257263   | 10.77784612319905 | 0.82285209872869   | c |
| 7.29939711255068   | 12.13741863149984 | 1.95834782692799   | c |
| 9.06317005584112   | 13.43255149354830 | 0.45465751055587   | c |
| 8.85592942419815   | 13.35139056026724 | -2.19272808327313  | c |
| 6.87549698893082   | 12.00304517309142 | -3.33468055454863  | c |
| 0.08366479026318   | 11.83203280462724 | -3.76460341276958  | c |
| -2.38443838298263  | 11.28539108692751 | -4.62704874253548  | c |
| -4.10036720684941  | 13.25047565946948 | -5.11827566234104  | c |
| -3.39251095070893  | 15.78050668333935 | -4.71095190703022  | c |
| -0.95613350662883  | 16.33504695731956 | -3.81230495744868  | c |
| 0.77879054675722   | 14.37598193333404 | -3.34559439033128  | c |
| 3.38890174885213   | 8.32536973959158  | -6.44406622554771  | c |
| 4.67641457254953   | 6.01425214469105  | -6.77863155540726  | c |
| 5.65244623511895   | 5.35266837769893  | -9.15894424572077  | c |
| 5.33644118968803   | 6.96130903364804  | -11.26310350180243 | c |
| 4.03600814710457   | 9.26846412607156  | -10.92430357217133 | c |
| 3.06877631128769   | 9.94029571929746  | -8.54608944644731  | c |
| 3.87802479617857   | 5.86716176424367  | -16.48535150408860 | c |
| 1.38036478552190   | 5.68588996785474  | -15.57025973709126 | c |
| -0.65604512924494  | 5.43244757263113  | -17.25985871681997 | c |
| -0.22524131751208  | 5.37961262141368  | -19.87720346047223 | c |
| 2.26073868688293   | 5.54213896997358  | -20.80373184842113 | c |
| 4.30009825766926   | 5.75638843246847  | -19.12361373682798 | c |

Supplementary Material (ESI) for Dalton Transactions  
This journal is (c) The Royal Society of Chemistry 2010

|                   |                    |                    |   |
|-------------------|--------------------|--------------------|---|
| 8.36762660357287  | 8.87447512888059   | -15.43070289785344 | c |
| 10.94208584840781 | 9.10542703547816   | -14.76342499135133 | c |
| 12.31282057891288 | 11.27957919082036  | -15.43207682634717 | c |
| 11.13601754907551 | 13.23175943121957  | -16.79883402903819 | c |
| 8.58037863849264  | 13.00387086967815  | -17.48922390152529 | c |
| 7.19732595152585  | 10.84055312593490  | -16.80865336208946 | c |
| -3.67246731581270 | -1.27111326081634  | 12.30117876297774  | h |
| 2.62536297194205  | -0.69269798044351  | -26.05161019436252 | h |
| -0.35111044814765 | -1.97022118823833  | -22.58533721640591 | h |
| 7.18295226674942  | 0.17239484684604   | -25.04574646551477 | h |
| 8.75349845864213  | -0.24110088078463  | -20.61131040714779 | h |
| 1.21406419530015  | -2.45444238464423  | -18.16389470043192 | h |
| -7.45806289303411 | -6.15102177718353  | -11.93519713626995 | h |
| -8.66896128983999 | -10.65406092786769 | -12.57131433171327 | h |
| -6.35706370970886 | -14.10491119837487 | -10.27435146915145 | h |
| -2.82845245522159 | -12.98160225625397 | -7.27659691169054  | h |
| -1.64272163879339 | -8.49003746657265  | -6.58888825101561  | h |
| 9.80875043064670  | -4.63675385790501  | -12.47577673065852 | h |
| 11.92055442108519 | -8.83401759428602  | -12.65925611886614 | h |
| 11.40524007015938 | -11.60792449296584 | -16.48809441666314 | h |
| 8.72693937337452  | -10.13161634181728 | -20.11682628050860 | h |
| 6.57768696753137  | -5.94653134220163  | -19.93552001185992 | h |
| 1.00770874545491  | 5.75065334813626   | -13.52322695312131 | h |
| -2.59368532835559 | 5.27885288072237   | -16.50884883607910 | h |
| -1.82289462876221 | 5.20486352813548   | -21.20227957770821 | h |
| 2.618065726295055 | 5.48893524633577   | -22.85426881459615 | h |
| 6.23979754471942  | 5.85719854345190   | -19.87738562925589 | h |
| 5.20003698876808  | 10.68240833385096  | -17.37736722310379 | h |
| 7.65018494053170  | 14.52421976637236  | -18.56807909739420 | h |
| 12.21286049358753 | 14.93352697379151  | -17.33268623666115 | h |
| 14.31638962440100 | 11.44333634200224  | -14.88439216750071 | h |
| 11.88567832033087 | 7.57661105034841   | -13.70549958987890 | h |
| 18.24629026730833 | 1.98833677942369   | -12.49851442415714 | h |
| 20.99399172272820 | 5.71412533568143   | -11.61256762566613 | h |
| 19.26812495057479 | 9.45833010371401   | -9.26389343697470  | h |
| 14.73447422052224 | 9.45295676249964   | -7.82734259368743  | h |
| 11.96315298896654 | 5.75330738231024   | -8.73287471707992  | h |
| 16.29417125630696 | -2.81153766287557  | -8.87796986752551  | h |
| 19.21471268616207 | -6.02809568616135  | -10.68412458842740 | h |
| 19.48368032400157 | -6.65138978314735  | -15.38088745338779 | h |
| 16.76699838110430 | -4.03989693752188  | -18.26575143533120 | h |
| 13.80821410748453 | -0.82308772241799  | -16.46808703823972 | h |
| 4.40626375681938  | -6.59013055951862  | -7.71396022785821  | h |
| 5.39905693837992  | -10.64327779462721 | -9.69390789538805  | h |
| 2.00529376106044  | -14.56265477285270 | -3.24840502416818  | h |
| 1.08643508840506  | -10.47529306820372 | -1.29089049234280  | h |
| 12.62563972293608 | -6.60185876854682  | -4.04098133837125  | h |
| 13.22344690346557 | -11.21347729628677 | -4.81966003507392  | h |
| 10.51447268547011 | -14.38549908696013 | -2.55761314677706  | h |
| 7.14987717859896  | -12.89705837997314 | 0.45219270134143   | h |
| 6.52997161531250  | -8.28689726019637  | 1.22354021861805   | h |
| 13.57709238790138 | -6.93253667579493  | 1.38213890172419   | h |
| 17.06279392087504 | -5.99964832029293  | 4.40317307794455   | h |
| 17.36527099842015 | -1.73837351115459  | 6.47206543398747   | h |
| 14.08700384967252 | 1.58262082613087   | 5.50721840331355   | h |
| 10.57518500049725 | 0.65238189843833   | 2.53387180030161   | h |
| 13.93572558396259 | -0.89131303720981  | -2.11515818622241  | h |
| 15.22764920567433 | 0.95578090850159   | -6.22769741830161  | h |
| 8.03924529223408  | -1.32500378015242  | -9.51270374198777  | h |
| 6.69953467982826  | -3.07144319591932  | -5.35709749804173  | h |
| -0.51142675004782 | -7.20137765834195  | -12.22602212568919 | h |
| 3.25426603660905  | -6.49090880287665  | -14.93355807325512 | h |
| 3.68477222307123  | 1.27952153402190   | -12.29594528547692 | h |
| -0.02245028562416 | 0.54584789367417   | -9.50107735471666  | h |
| 3.78156141190075  | 10.57439637075113  | -12.52762271473632 | h |
| 2.05885018372204  | 11.74861447666494  | -8.32953993186743  | h |
| 4.91927339674261  | 4.71321784591408   | -5.16643447620659  | h |
| 6.68089953838961  | 3.55140497918387   | -9.37755883870101  | h |
| 6.72425027872060  | 11.96799686504931  | -5.41154977317968  | h |
| 10.23815484717724 | 14.35953194339101  | -3.38236392793535  | h |
| 10.61082929046621 | 14.50418245239061  | 1.34703877138298   | h |
| 7.45987141960995  | 12.16701004723543  | 4.03409751626238   | h |
| 3.956476976661189 | 9.75018642373727   | 2.01644095001340   | h |
| 9.78858359738770  | 4.39322854718552   | -2.74758917782243  | h |
| 13.82180341407039 | 6.48780609596927   | -1.87912662480689  | h |
| 11.56145384965268 | 7.44276989533730   | 6.01872195810258   | h |
| 7.53426740678956  | 5.37286634238042   | 5.08045091175754   | h |
| 1.66913963374465  | 8.48044344670356   | 6.60544543255333   | h |
| 2.84790190630313  | 12.97439646830917  | 7.29000819273626   | h |
| 6.37418745070814  | 14.10525538654025  | 10.28753749473213  | h |

Supplementary Material (ESI) for Dalton Transactions  
This journal is (c) The Royal Society of Chemistry 2010

|                    |                    |                    |   |
|--------------------|--------------------|--------------------|---|
| 8.69251540711085   | 10.65954336801023  | 12.58574727721108  | h |
| 7.48879837658969   | 6.15413854320234   | 11.95264620416119  | h |
| -1.06609763207176  | 10.46079168206172  | 1.29840304657326   | h |
| -4.37206103943648  | 6.58676744845988   | 7.73545383172124   | h |
| -5.37438310376931  | 10.64359339999936  | 9.70332002606615   | h |
| -1.99466841339517  | 14.55161211766370  | 3.24347269365155   | h |
| -2.96903051281433  | 9.31047983580977   | -4.94779664727717  | h |
| -6.00501885862714  | 12.78982820516956  | -5.82348893465061  | h |
| -4.74025050120866  | 17.32250395629788  | -5.09491861523939  | h |
| -0.38551617128879  | 18.31230436526651  | -3.48605773711320  | h |
| 2.68688131297312   | 14.84381310782773  | -2.65902314009782  | h |
| -6.50875956089955  | 8.27848827048706   | -1.22303302576244  | h |
| -7.13632340701805  | 12.89024607584899  | -0.46873834208494  | h |
| -10.49999209701901 | 14.38412154159092  | 2.53958244595106   | h |
| -13.19653103184374 | 11.21566824224629  | 4.82138852817883   | h |
| -12.59049442406765 | 6.60212285463625   | 4.06049802108092   | h |
| -9.80204370631890  | 4.62490694522759   | 12.49840030726974  | h |
| -11.91622191200926 | 8.82150301671049   | 12.67496878608705  | h |
| -11.38538754071037 | 11.61075408328953  | 16.49043846181883  | h |
| -8.68993409335223  | 10.15042843512373  | 20.11292906310956  | h |
| -6.53845863455042  | 5.96617707380941   | 19.93827834336947  | h |
| -16.28902282453257 | 2.78419070024835   | 8.90162725355507   | h |
| -19.22264485502891 | 5.98446717651756   | 10.71524621005210  | h |
| -19.48788418512570 | 6.60190581400455   | 15.41290297332343  | h |
| -16.75373251473650 | 4.00172342206931   | 18.29144274559562  | h |
| -13.78069636399864 | 0.80153111552388   | 16.48563052792959  | h |
| -8.74294802004286  | 0.29428560212457   | 20.63850428098822  | h |
| -7.17249749748101  | -0.12177160306804  | 25.07218526406188  | h |
| -2.60448144781703  | 0.69618321499188   | 26.07073909441494  | h |
| 0.38191190175565   | 1.93095833644882   | 22.59754563951644  | h |
| -1.18223264914179  | 2.41738556733533   | 18.17601601463415  | h |
| -11.85839464213330 | -7.56077876481783  | 13.72766640828478  | h |
| -14.29800526851475 | -11.42371487656919 | 14.90139204243538  | h |
| -12.20178238894377 | -14.92209511532685 | 17.34531585158981  | h |
| -7.63712077144850  | -14.52648558340029 | 18.57672852827021  | h |
| -5.17794373431157  | -10.68963728658594 | 17.38918710422590  | h |
| -6.20988742484651  | -5.88708605895048  | 19.90066753446363  | h |
| -2.58993899575286  | -5.50690487845289  | 22.87834074013374  | h |
| 1.84832404155027   | -5.18371227101278  | 21.22651350213756  | h |
| 2.61835778990668   | -5.23328351783161  | 16.53251248473190  | h |
| -0.98022498857157  | -5.71721532635518  | 13.54591043554166  | h |
| -3.73010759999355  | -10.56448396312912 | 12.55721993105581  | h |
| -2.00833246105815  | -11.74285481080451 | 8.36010698174823   | h |
| -6.66329494517852  | -3.56228494653582  | 9.39214467318546   | h |
| -4.90237366380372  | -4.72809196340909  | 5.18176568484305   | h |
| -8.01264168513922  | 1.32065874535114   | 9.53259891233617   | h |
| -6.67256388379137  | 3.06891924403377   | 5.37801564819174   | h |
| -13.90876450495127 | 0.89059589028792   | 2.13470025806890   | h |
| -15.20022214833983 | -0.95974117931366  | 6.24554157558812   | h |
| -18.20745197514944 | -2.03523278098397  | 12.53060770456419  | h |
| -20.93864424452543 | -5.77109592707146  | 11.63720901999312  | h |
| -19.20228895785360 | -9.49451058640369  | 9.26319547682152   | h |
| -14.67387621248621 | -9.45855953859344  | 7.81027981701261   | h |
| -11.91866384429960 | -5.74923563044717  | 8.72363862014338   | h |
| -9.76096613932899  | -4.40586689587116  | 2.76292203700677   | h |
| -13.79227074493449 | -6.50211503219328  | 1.88837282661500   | h |
| -11.51333450072507 | -7.46993413096444  | -6.00248874452180  | h |
| -7.48739411514622  | -5.40099151758216  | -5.05752387059908  | h |
| -6.68353791229746  | -11.98272571670555 | 5.43744201576627   | h |
| -10.18793507360937 | -14.38941740409192 | 3.40920336209026   | h |
| -10.55697718176863 | -14.54173848638128 | -1.32022795538441  | h |
| -7.41417678154429  | -12.19484287073363 | -4.00840001910666  | h |
| -3.91943913209551  | -9.76453810674907  | -1.99171497904228  | h |
| -10.55113043740154 | -0.66617662962384  | -2.50222053649412  | h |
| -14.06745454649469 | -1.60290657184069  | -5.46842059190207  | h |
| -17.34166591348456 | 1.71897616214534   | -6.44296718044754  | h |
| -17.03087116911865 | 5.98795852970883   | -4.39129138788953  | h |
| -13.54177620467383 | 6.92706303514517   | -1.37599959280220  | h |
| -7.941335106156220 | 4.90191175294977   | -4.94128272778607  | h |
| -10.20980541141233 | 7.65545989316735   | -7.87966605641158  | h |
| -3.34547586897004  | 8.35512892976409   | -12.43569156692721 | h |
| -1.11876050685594  | 5.60863078511611   | -9.43753671172937  | h |
| -7.84995524645028  | -0.79669972524617  | -7.04403863396800  | h |
| -11.26519720790939 | 1.47514563016355   | -9.36597398181776  | h |
| -11.13313831491999 | 1.78621782202192   | -14.10826488700393 | h |
| -7.53207031243462  | -0.17332731773835  | -16.49849111650152 | h |
| -4.12309153749449  | -2.46979609862547  | -14.18699693046252 | h |
| 3.01181353468541   | -9.30096197110917  | 4.94615156152185   | h |
| 6.05803772216588   | -12.77040265324530 | 5.82564014029294   | h |
| 4.79563936234686   | -17.30941669292791 | 5.13207479131363   | h |

Supplementary Material (ESI) for Dalton Transactions  
This journal is (c) The Royal Society of Chemistry 2010

|                     |                    |                    |   |
|---------------------|--------------------|--------------------|---|
| -2.64702435536211   | -14.85600445734820 | 2.71820226910752   | h |
| 0.43390740176583    | -18.31516990990826 | 3.55264062099371   | h |
| 7.97176411919387    | -4.92014271572570  | 4.95858101065673   | h |
| 1.15177434537084    | -5.61226716192987  | 9.46112236373686   | h |
| 3.38248196769496    | -8.34156236425554  | 12.47171859725422  | h |
| 10.24438274921354   | -7.65680976754479  | 7.90959327056546   | h |
| 7.88073435882264    | 0.78783558060721   | 7.07532003151598   | h |
| 11.29760987245788   | -1.47425688789220  | 9.40406460627531   | h |
| 11.16588888020122   | -1.77102488908585  | 14.14738668531564  | h |
| 7.56222976246987    | 0.19107873734514   | 16.53143284725866  | h |
| 4.15179011433809    | 2.47857560184400   | 14.21302061575248  | h |
| -3.21382659369588   | 6.48798013164079   | 14.96698368307358  | h |
| 0.55332400758177    | 7.19532391091939   | 12.26036972607816  | h |
| 0.03788353635036    | -0.54077266578805  | 9.50884281528547   | h |
| 11.72171976191144   | 3.22158085298845   | -18.18136918214530 | n |
| -11.65930889033272  | -3.22318294457255  | 18.22020923431910  | n |
| -12.886835622214834 | -4.44592599906417  | 19.59531658849991  | c |
| 12.97391514349729   | 4.42930869686643   | -19.54742518910348 | c |
| -14.41419826267991  | -5.98062747673218  | 21.29760040598847  | c |
| -13.57699968992273  | -5.99413824232582  | 23.22394932537524  | h |
| -16.36580996298627  | -5.21366806958437  | 21.42139582370514  | h |
| -14.50579259105088  | -7.95666213844201  | 20.59000205979996  | h |
| 14.53149973384630   | 5.94157388487329   | -21.24262057182801 | c |
| 14.29906789057356   | 5.29453542259566   | -23.22744773222598 | h |
| 13.97384555980807   | 7.96305921851165   | -21.11960886115462 | h |
| 16.55767177054597   | 5.76954363728422   | -20.71620719096935 | h |
| -4.32632324801795   | 15.28584500579469  | 7.76550534885427   | n |
| 8.29641167671003    | -9.79742299022446  | 12.15772993255691  | n |
| -15.33383115964185  | -8.30697524666585  | -2.66774888636610  | n |
| -8.24369289278154   | 9.85647693512788   | -12.08838475579496 | n |
| 15.35234317668574   | 8.33369359745513   | 2.66412431204873   | n |
| 4.33631949354416    | -15.28881791867889 | -7.77219001039832  | n |
| -3.59000334897448   | 17.62777724936139  | 6.52068171390379   | c |
| -4.21740309364850   | 19.25669563721959  | 7.67500849759164   | h |
| -1.49940314744487   | 17.77632206582041  | 6.28072168375384   | h |
| -4.47462403622697   | 17.81332046485627  | 4.61710257779105   | h |
| -5.53870458773034   | 15.37884334856147  | 10.23482573549868  | c |
| -5.86661779334593   | 17.37458109765816  | 10.77268849316810  | h |
| -7.40588036373020   | 14.40301998127977  | 10.22405302673257  | h |
| -4.35102740891757   | 14.49200842914144  | 11.73565667656125  | h |
| 15.93162086831760   | 9.17557402426543   | 5.21996555355393   | c |
| 15.98040842318430   | 7.57375385797873   | 6.59188024147533   | h |
| 17.81283272421574   | 10.09222334957540  | 5.241406833574565  | h |
| 14.52632611274833   | 10.58218132745313  | 5.91782576110702   | h |
| 17.23141623191588   | 8.62761454962521   | 0.67527840397126   | c |
| 16.48362287626776   | 9.74822193680023   | -0.94517670452951  | h |
| 18.89551685136827   | 9.64374467248382   | 1.43569257556680   | h |
| 17.89514333275739   | 6.76926672575936   | -0.07032954000303  | h |
| 10.93984884190920   | -10.43293118697922 | 11.72460997713551  | c |
| 11.62912365196770   | -11.64375640734992 | 13.28606764079900  | h |
| 11.21693357002421   | -11.48995349137421 | 9.92047900189231   | h |
| 12.15675918305184   | -8.71358221212238  | 11.66175490115415  | h |
| 6.97573464538537    | -10.86310345536594 | 14.32414358683684  | c |
| 8.30432891839299    | -12.02888821965880 | 15.44440327613902  | h |
| 6.21354414684992    | -9.36337751622355  | 15.59443122750867  | h |
| 5.36862787261020    | -12.09755434381640 | 13.74058845811141  | h |
| 3.58575878603722    | -17.63255679542294 | -6.53928214232660  | c |
| 1.49385732477569    | -17.77235021592117 | -6.30492768337499  | h |
| 4.20866642498684    | -19.25944295589286 | -7.69889239967557  | h |
| 4.46494047916453    | -17.83047739237057 | -4.63447986862401  | h |
| 5.54557856701371    | -15.37684004966161 | -10.24322379712372 | c |
| 7.41458614287394    | -14.40471777049900 | -10.23131731188306 | h |
| 5.86940368602860    | -17.37159389033433 | -10.78720171674924 | h |
| 4.35815692609019    | -14.48323048985365 | -11.74034900038852 | h |
| -17.19791471244894  | -8.64248083243798  | -0.67147988570711  | c |
| -18.91742511668047  | -9.53061936647170  | -1.46795988665977  | h |
| -16.48642648462354  | -9.88703248032352  | 0.87574556094959   | h |
| -17.76660193291972  | -6.80236499733002  | 0.18419919225353   | h |
| -15.86850767842698  | -9.23785938817784  | -5.20238439956105  | c |
| -17.78477973062331  | -10.07782774388997 | -5.24578348101176  | h |
| -15.81534988233234  | -7.69207789845698  | -6.63486034416892  | h |
| -14.49934545063417  | -10.72452631948743 | -5.80375091315416  | h |
| -6.93785181041572   | 10.88167292878189  | -14.28302731044061 | c |
| -6.29978476599153   | 9.36786202223026   | -15.60657658093922 | h |
| -8.23166778200125   | 12.14652085635151  | -15.33448674144671 | h |
| -5.24851004988847   | 12.01248900237842  | -13.72828952072384 | h |
| -10.90467817289805  | 10.43960271853844  | -11.68994470077848 | c |
| -11.23189018995481  | 11.38360459472593  | -9.83403206475677  | h |
| -11.56321239109536  | 11.74261832415595  | -13.18918364720150 | h |
| -12.11179981536861  | 8.71189103326820   | -11.76065850784720 | h |
